# Supplementary material for: Sulphonyl thiourea compounds containing pyrimidine as dual inhibitors of I, II, IX, and XII carbonic anhydrases and cancer cell lines: synthesis, characterization and in silico studies
Source: Royal Society of Chemistry journal article supplement (doi:10.1039/d4md00816b), 2024-12-11

## Supporting Information Data for

### Sulphonyl thiourea compounds containing pyrimidine as dual inhibitors for I, II, IX, XII carbonic anhydrases and cancer cell lines: Synthesis, characterization and in silico studies

Nguyen Dinh Thanh,<sup>a\*</sup> Vu Ngoc Toan,<sup>b</sup> Vu Minh Trang<sup>c</sup>

<sup>a</sup> Faculty of Chemistry, University of Science (Vietnam National University, Hanoi), 19 Le Thanh Tong, Ha Noi, Viet Nam.

<sup>b</sup> Institute of New Technology, Military Institute of Science and Technology (Ministry of Military), 17 Hoang Sam, Cau Giay, Ha Noi, Viet Nam.

<sup>c</sup> VNU University of Education, Vietnam National University, Hanoi, 144 Xuan Thuy, Cau Giay, Ha Noi, Viet Nam.

#### 1. General procedure for synthesis of substituted 2-amino-4,6-diarylpyrimidines (4a-m)

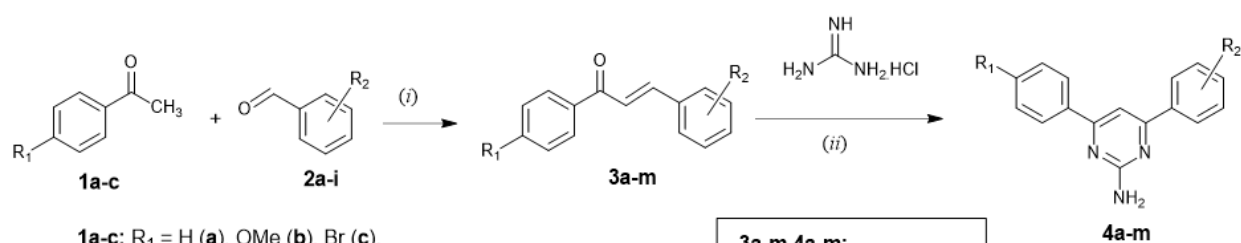

| 3a-m, 4a-m:    |                    |     |
|----------------|--------------------|-----|
| R <sub>1</sub> | R <sub>2</sub>     |     |
| H              | H                  | (a) |
| H              | 4-F                | (b) |
| H              | 3-OH               | (c) |
| H              | 4-OH               | (d) |
| OMe            | 4-Cl               | (e) |
| OMe            | 4-Br               | (f) |
| OMe            | 4-Me               | (g) |
| OMe            | 4- <i>i</i> Pr     | (h) |
| OMe            | 4-NMe <sub>2</sub> | (i) |
| Br             | 4-Me               | (j) |
| Br             | 4- <i>i</i> Pr     | (k) |
| Br             | 4-OH               | (l) |
| Br             | 4-NMe <sub>2</sub> | (m) |

These compounds were synthesized according to the literature procedure with the little modification.<sup>1</sup> Firstly, substituted chalcones **3a-m** were prepared by reaction between substituted acetophenones **1a-c** and corresponding substituted benzaldehydes **2a-i** according to literature

procedure and their structures were confirmed by melting points.<sup>1,2</sup> Then, a reaction mixture of appropriate substituted benzylideneacetophenones (**3a-m**, 10 mmol), guanidine hydrochloride (15 mmol) and sodium hydroxide (45 mmol) were mixed carefully with a little 96% ethanol. Then it was heated under microwave-assisted and solvent-free condition for 1–2 min, the reaction mixture had become dark-yellow. Upon completion, monitored by TLC, the reaction mixture was cooled to room temperature and then triturated with water and the formed precipitate was filtered by suction and washed with water until neutral to afford the titled compounds **4a-m**, recrystallized from 1:1 EtOH-toluene to give ivory-white crystals.

#### ***2-Amino-4,6-diphenylpyrimidine (4a)***

From *trans*-benzylideneacetophenone **3a** (0.005 mol, 1.04 g). M.p.: 118–119°C. Ref.:<sup>1</sup> 118–119°C. Yield: 0.96 g (78%). <sup>1</sup>H NMR (500 MHz, DMSO-*d*<sub>6</sub>), δ (ppm): 8.22–8.20 (m, 4H, *J*=3.5 Hz, H-3' & H5' and H-3'' & H-5''), 7.70 (s, 1H, H-5), 7.53–7.52 (m, 6H, *J*=3.0 Hz, H-2', H=4' & H-6' and H-2'', H=4'' & H-6''). <sup>13</sup>C NMR (150 MHz, DMSO-*d*<sub>6</sub>), δ (ppm): 161.8 (C-2 pyrimidine), 158.5, 136.3, 129.5, 128.8 (4C), 127.2 (4C), 108.4 (C-5 pyrimidine).

#### ***2-Amino-4-(4-fluorophenyl)-6-phenylpyrimidine (4b)***

From *trans*-2-(4-fluorobenzylidene)acetophenone **3b** (0.005 mol, 1.13 g). M.p.: 132–133°C. Ref.:<sup>1</sup> 132–133°C. Yield: 1.13 g (85%). <sup>1</sup>H NMR (500 MHz, DMSO-*d*<sub>6</sub>), δ (ppm): 8.29 (dd, *J*= 7.0 Hz, *J*<sub>HF</sub>=10.5 Hz, 2H, H-3'' & H-5''), 8.23–8.21 (m, 2H, H-3' & H-5'), 7.71 (s, 1H, H-5), 7.53–7.52 (m, 3H, H-2', H-4' & H6'), 7.35 (t, *J*=7.0 Hz, *J*<sub>HF</sub>=2.5 Hz, 2H, H-2'' & H-6''), 6.73 (s, 2H, NH<sub>2</sub>). <sup>13</sup>C NMR (150 MHz, DMSO-*d*<sub>6</sub>) δ 164.6, 162.9, 162.0 (C-2 pyrimidine), 159.1, 158.5, 136.2, 130.6, 130.6, 129.6, 128.7 (2C), 127.97 & 127.92 (*J*<sub>CF</sub> = 7.95 Hz), 127.5 (2C), 115.7 & 115.6 (*J*<sub>CF</sub> = 19.95 Hz), 108.4 (C-5 pyrimidine).

#### ***2-Amino-4-(3-hydroxyphenyl)-6-phenylpyrimidine (4c)***

From *trans*-(3-hydroxybenzylidene)acetophenone **3d** (0.005 mol, 1.34 g). M.p.: 231–232°C. Yield: 1.03 g (78%). <sup>1</sup>H NMR (500 MHz, DMSO-*d*<sub>6</sub>), δ (ppm): 9.59 (s, 1H, OH), 8.20–8.18 (m, 2H, *J*=2.75 Hz, H-3'' & H-5''), 7.61 (s, 1H, *J*=1.0 Hz, H-2'), 7.60 (m, 1H, *J*=7.5 Hz & 4.5 Hz, H-4'), 7.59 (s, 1H, H-5), 7.52–7.51 (t, 3H, *J*=3.25 Hz, H-2'', H=4'' & H-6''), 7.30 (t, 1H, *J*=2.75 Hz, H-6'), 6.91 (ddd, 1H, *J*=8.0 Hz, 2.5 Hz & 1.0 Hz, H-5'), 6.675 (s, 2H, NH<sub>2</sub>). <sup>13</sup>C NMR (150 MHz, DMSO-*d*<sub>6</sub>) δ 162.5 (C-2 pyrimidine), 158.7, 158.7, 157.7, 136.2, 134.0, 130.0, 129.6, 128.7 (2C), 127.5 (2C), 119.0, 117.4, 112.3, 108.5 (C-5 pyrimidine).

**2-Amino-4-(4-Hydroxyphenyl)-6-phenylpyrimidine (4d)**

From *trans*-(4-hydroxybenzylidene)acetophenone **3c** (0.005 mol, 1.34 g). M.p.: 239–240°C. Yield: 0.99 g (75%). <sup>1</sup>H NMR (500 MHz, DMSO-*d*<sub>6</sub>), δ (ppm): 9.90 (s, 1H, OH), 8.19–8.17 (m, 2H, *J*=2.25 Hz, H-3'' & H-5''), 8.08 (d, 2H, *J*=9.0 Hz, H-3' & H5'), 7.59 (s, 1H, H-5), 7.51–7.50 (m, 3H, *J*=2.5 Hz, H-2'', H=4'' & H-6''), 6.87 (d, 2H, *J*=8.5 Hz, H-2' & H6'), 6.60 (s, 2H, NH<sub>2</sub>). <sup>13</sup>C NMR (150 MHz, DMSO-*d*<sub>6</sub>) δ (ppm): 162.0 (C-2 pyrimidine), 159.1, 158.8, 158.5, 136.2, 129.6, 128.7, 128.7 (2C), 128.6 (2C), 127.5 (2C), 115.8 (2C), 108.4 (C-5 pyrimidine).

**2-Amino-4-(4-chlorophenyl)-6-(4-methoxyphenyl)pyrimidine (4e)**

From *trans*-2-(4-chlorobenzylidene)-4'-methoxyacetophenone **3e** (0.005 mol, 1.36 g). M.p.: 156–157°C. Yield: 1.33 g (85%). <sup>1</sup>H NMR (500 MHz, DMSO-*d*<sub>6</sub>), δ (ppm): 8.29–8.28 (m, 2H, H-2'' & H-6''). 8.22 (d, *J*=9.0 Hz, 2H, H-2' & H6'), 7.72 (s, 1H, H-5), 7.57–7.54 (m, 2H, H-3'' & H-5''), 7.06 (d, *J*=9.0 Hz, H-3' & H-5'), 6.71 (s, 2H, NH<sub>2</sub>), 3.84 (s, 3H, 4'-OCH<sub>3</sub>). <sup>13</sup>C NMR (150 MHz, DMSO-*d*<sub>6</sub>) δ 162.1 (C-2 pyrimidine), 159.1, 158.7, 158.6, 136.1, 131.8, 129.1, 128.7 (2C), 128.6 (2C), 128.5 (2C), 114.0 (2C), 108.9 (C-5 pyrimidine), 55.3 (4-OCH<sub>3</sub> phenyl).

**2-Amino-4-(4-bromophenyl)-6-(4-methoxyphenyl)pyrimidine (4f)**

From *trans*-2-(4-bromobenzylidene)-4'-methoxyacetophenone **3f** (0.005 mol, 1.58 g). M.p.: 170–171°C. Yield: 1.39 g (78%). <sup>1</sup>H NMR (500 MHz, DMSO-*d*<sub>6</sub>), δ (ppm): 8.20 (d, *J* = 8.5 Hz, 2H, H-2'' & H-6''), 8.17 (d, *J*=8.5 Hz, 2H, H2' & H-6'), 7.71 (d, *J*=8.5 Hz, 2H, H-3'' & H-5''), 7.68 (s, 1H, H-5), 7.06 (d, *J*=8.5 Hz, 2H, H-3' & H-5'), 6.69 (s, 2H, NH<sub>2</sub>), 3.84 (s, 3H, 4'-OCH<sub>3</sub>). <sup>13</sup>C NMR (150 MHz, DMSO-*d*<sub>6</sub>) δ 162.1 (C-2 pyrimidine), 159.1, 158.5, 158.0, 132.0, 131.5 (2C), 128.6 (2C), 128.2, 127.8 (2C), 121.9, 114.0 (2C), 108.8 (C-5 pyrimidine), 55.3 (4-OCH<sub>3</sub> phenyl).

**2-Amino-4-(4-methylphenyl)-6-(4-methoxyphenyl)pyrimidine (4g)**

From *trans*-2-(4-methylbenzylidene)-4'-methoxyacetophenone **3g** (0.005 mol, 1.26 g). M.p.: 125–126°C. Yield: 1.18 g (81%). <sup>1</sup>H NMR (500 MHz, DMSO-*d*<sub>6</sub>), δ (ppm): 8.20 (d, *J*=9.0 Hz, 2H, H-2' & H6'), 8.11 (d, *J* = 8.0 Hz, 2H, H-2'' & H-6''), 7.61 (s, 1H, H-5), 7.31 (d, *J* = 8.0 Hz, 2H, H-3'' & H-5''), 7.05 (d, *J* = 9.0 Hz, 2H, H-3' & H-5'), 6.60 (s, 2H, NH<sub>2</sub>), 3.84 (s, 3H, 4'-OCH<sub>3</sub>), 2.50 (s, 3H, 4''-CH<sub>3</sub>). <sup>13</sup>C NMR (150 MHz, DMSO-*d*<sub>6</sub>) δ 162.1 (C-2 pyrimidine), 159.1, 158.6, 158.3, 140.1, 131.7, 129.1, 129.0 (2C), 128.5 (2C), 127.5 (2C), 114.0 (2C), 108.6 (C-5 pyrimidine), 55.3 (4-OCH<sub>3</sub> phenyl), 21.2 (4-CH<sub>3</sub> phenyl).

**2-Amino-4-(4-isopropylphenyl)-6-(4-methoxyphenyl)pyrimidine (4h)**

From *trans*-2-(4-isopropylbenzylidene)-4'-methoxyacetophenone **3h** (0.005 mol, 1.40 g). M.p.: 126–127°C. Yield: 1.29 g (81%). <sup>1</sup>H NMR (500 MHz, DMSO-*d*<sub>6</sub>), δ (ppm): 8.18 (d, *J* = 9.0 Hz, 2H, H-2' & H6'), 7.05 (d, *J* = 9.0 Hz, 2H, H-3' & H-5'), 8.13 (d, *J* = 8.0 Hz, 2H, H-2'' & H-6''), 7.61 (s, 1H, H-5), 7.37 (d, *J* = 8.0 Hz, 2H, H-3'' & H-5''), 6.60 (s, 2H, NH<sub>2</sub>), 3.84 (s, 3H, 4'-OCH<sub>3</sub>), 2.96 [t, *J* = 7.0 Hz, 1H, 4''-CH(CH<sub>3</sub>)<sub>2</sub>], 1.24 [t, *J* = 7.0 Hz, 6H, 4''-CH(CH<sub>3</sub>)<sub>2</sub>]. <sup>13</sup>C NMR (150 MHz, DMSO-*d*<sub>6</sub>) δ 162.1 (C-2 pyrimidine), 159.2, 158.3, 158.3, 147.1, 132.8, 129.6, 128.6 (2C), 128.3 (2C), 125.6 (2C), 114.0 (2C), 108.4 (C-5 pyrimidine), 55.3 (4-OCH<sub>3</sub> phenyl), 33.7 [4-CH(CH<sub>3</sub>)<sub>2</sub>], 23.9 [4-CH(CH<sub>3</sub>)<sub>2</sub>].

**2-Amino-4-(4-dimethylaminophenyl)-6-(4-methoxyphenyl)pyrimidine (4i)**

From *trans*-2-(4-dimethylaminobenzylidene)-4'-methoxyacetophenone **3i** (0.005 mol, 1.41 g). M.p.: 175–176°C. Yield: 1.26 g (79%). <sup>1</sup>H NMR (500 MHz, DMSO-*d*<sub>6</sub>), δ (ppm): 8.17 (d, *J* = 9.0 Hz, 2H, H-2' & H6'), 8.08 (d, *J* = 9.0 Hz, 2H, H-2'' & H-6''), 7.51 (s, 1H, H-5), 7.05 (d, *J* = 9.0 Hz, 2H, H-3' & H-5'), 6.79 (d, *J* = 9.0 Hz, 2H, H-3'' & H-5''), 6.42 (s, 2H, NH<sub>2</sub>), 3.00 [s, 6H, 4''-N(CH<sub>3</sub>)<sub>2</sub>], 3.83 (s, 3H, 4'-OCH<sub>3</sub>). <sup>13</sup>C NMR (150 MHz, DMSO-*d*<sub>6</sub>) δ 162.1 (C-2 pyrimidine), 159.2, 158.3, 158.1, 151.5, 129.6, 128.8, 128.6 (2C), 128.5 (2C), 114.0 (2C), 112.2 (2C), 108.3 (C-5 pyrimidine), 55.3 (4-OCH<sub>3</sub> phenyl), 40.3 (4-N(CH<sub>3</sub>)<sub>2</sub>).

**2-Amino-4-(4-bromophenyl)-6-(4-methylphenyl)pyrimidine (4j)**

From *trans*-2-(4-methylbenzylidene)-4'-bromoacetophenone **3J** (0.005 mol, 1.51 g). M.p.: 152–153°C. Yield: 75%. <sup>1</sup>H NMR (500 MHz, DMSO-*d*<sub>6</sub>), δ (ppm): 8.18 (d, *J* = 8.5 Hz, 2H, H-2' & H6'), 8.13 (d, *J* = 8.0 Hz, 2H, H-2'' & H-6''), 7.71 (d, *J* = 8.5 Hz, 2H, H-3' & H-5'), 7.70 (s, 1H, H-5), 7.32 (d, *J* = 8.0 Hz, 2H, H-3'' & H-5''), 6.74 (s, 2H, NH<sub>2</sub>), 2.37 (s, 3H, 4''-CH<sub>3</sub>). <sup>13</sup>C NMR (150 MHz, DMSO-*d*<sub>6</sub>) δ 162.1 (C-2 pyrimidine), 158.6, 158.4, 140.4, 131.9, 131.6, 131.5 (2C), 129.0 (2C), 128.1 (2C), 127.8 (2C), 121.6, 108.3 (C-5 pyrimidine), 21.2 (4-CH<sub>3</sub> phenyl).

**2-Amino-4-(4-bromophenyl)-6-(4-isopropylphenyl)pyrimidine (4k)**

From *trans*-2-(4-isopropylbenzylidene)-4'-bromoacetophenone **3k** (0.005 mol, 1.65 g). M.p.: 155–156°C. Yield: 1.31 g (71%). <sup>1</sup>H NMR (500 MHz, DMSO-*d*<sub>6</sub>), δ (ppm): 8.14 (d, *J* = 8.25 Hz, 2H, H-2'' & H-6''), 8.17 (d, *J* = 8.5 Hz, 2H, H-2' & H-6'), 7.72 (d, *J* = 8.5 Hz, 2H, H-3' & H-5'), 7.38 (d, *J* = 8.25 Hz, 2H, H-3'' & H-5''), 7.69 (s, 1H, H-5), 6.74 (s, 2H, NH<sub>2</sub>), 2.96 [t, *J* = 7.75 Hz, 1H, 4''-CH(CH<sub>3</sub>)<sub>2</sub>], 1.24 [t, *J* = 7.75 Hz, 6H, 4''-CH(CH<sub>3</sub>)<sub>2</sub>]. <sup>13</sup>C NMR (150 MHz, DMSO-*d*<sub>6</sub>) δ 161.8 (C-2 pyrimidine), 157.3, 157.3, 147.2, 132.3, 132.3, 131.5 (2C), 128.5 (2C), 128.0 (2C), 125.6 (2C), 121.7, 108.5 (C-5 pyrimidine), 33.7 [4-CH(CH<sub>3</sub>)<sub>2</sub>], 23.9 [4-CH(CH<sub>3</sub>)<sub>2</sub>].

**2-Amino-4-(4-bromophenyl)-6-(4-hydroxyphenyl)pyrimidine (4l)**

From *trans*-2-(4-hydroxybenzylidene)-4'-bromoacetophenone **3l** (0.005 mol, 1.52 g). M.p.: 187–189°C. Yield: 1.30 g (76%). <sup>1</sup>H NMR (500 MHz, DMSO-*d*<sub>6</sub>), δ (ppm): 8.19 (d, *J* = 8.5 Hz, 2H, H-2' & H6'), 7.80 (d, *J* = 7.5 Hz, 2H, H-2'' & H-6''), 7.73 (d, *J* = 8.5 Hz, 2H, H-3' & H-5'), 7.72 (s, 1H, H-5), 7.43 (d, *J* = 7.5 Hz, 2H, H-3'' & H-5''), 6.78 (s, 2H, NH<sub>2</sub>). <sup>13</sup>C NMR (150 MHz, DMSO-*d*<sub>6</sub>) δ 162.1 (C-2 pyrimidine), 159.3, 158.8, 158.6, 131.9, 131.5 (2C), 129.0 (2C), 127.8 (2C), 127.7, 121.6, 115.8 (2C), 108.4 (C-5 pyrimidine).

**2-Amino-4-(4-bromophenyl)-6-(4-dimethylaminophenyl)pyrimidine (4m)**

From *trans*-2-(4-dimethylaminobenzylidene)-4'-bromoacetophenone **3l** (0.005 mol, 1.65 g). M.p.: 184–186°C. Yield: 1.38 g (75%). <sup>1</sup>H NMR (500 MHz, DMSO-*d*<sub>6</sub>), δ (ppm): 8.15 (d, *J* = 8.5 Hz, 2H, H-2' & H6'), 8.10 (d, *J* = 8.75 Hz, 2H, H-2'' & H-6''), 7.70 (d, *J* = 8.5 Hz, 2H, H-3' & H-5'), 7.59 (s, 1H, H-5), 6.78 (d, *J* = 8.75 Hz, 2H, H-3'' & H-5''), 6.55 (s, 2H, NH<sub>2</sub>), 3.00 [s, 6H, 4''-N(CH<sub>3</sub>)<sub>2</sub>]. <sup>13</sup>C NMR (150 MHz, DMSO-*d*<sub>6</sub>) δ 161.8 (C-2 pyrimidine), 157.9, 157.3, 151.5, 132.3, 131.5 (2C), 128.5 (2C), 128.2 (2C), 128.0, 121.7 (2C), 112.1, 108.5 (C-5 pyrimidine), 40.3 [4-N(CH<sub>3</sub>)<sub>2</sub>].

**References**

1. N. D. Thanh and N. T. T. Mai, *Carbohydrate Research*, 2009, **344**, 2399-2405.
2. N. A. A. Elkanzi, H. Hrichi, R. A. Alolayan, W. Derafa, F. M. Zahou and R. B. Bakr, *ACS Omega*, 2022, **7**, 27769-27786.

## 2. Lineweaver-Burk plots for sulphonyl thiourea compounds 7a-m

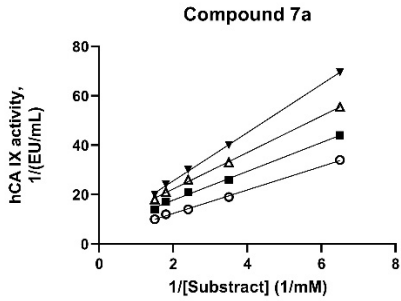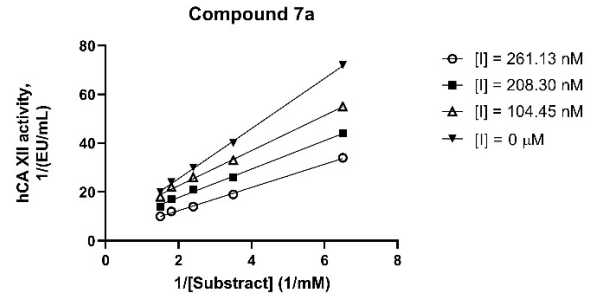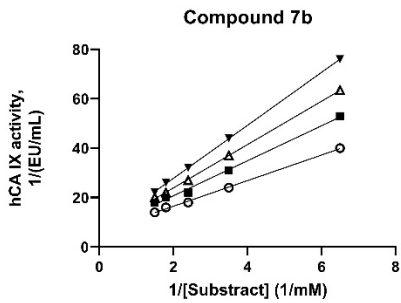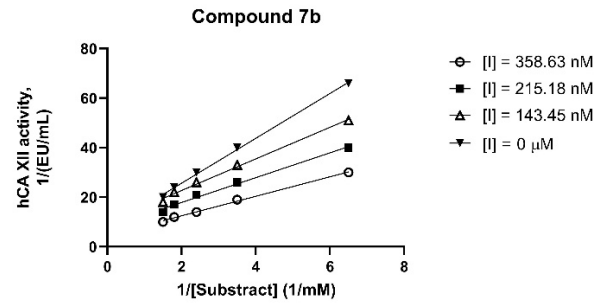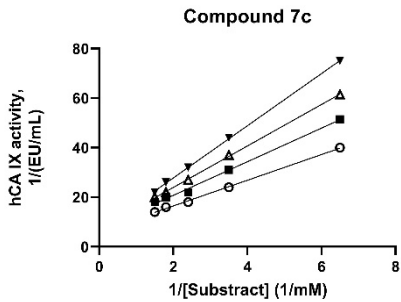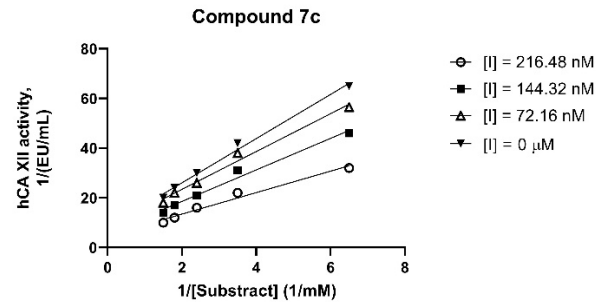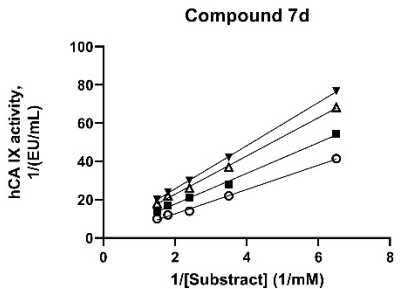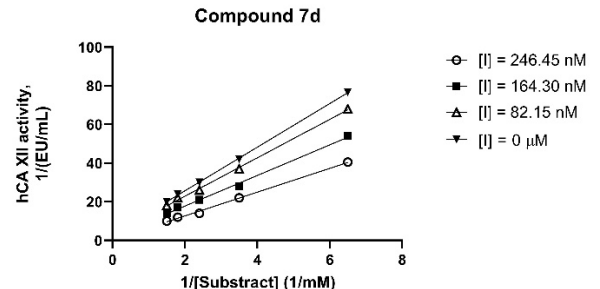

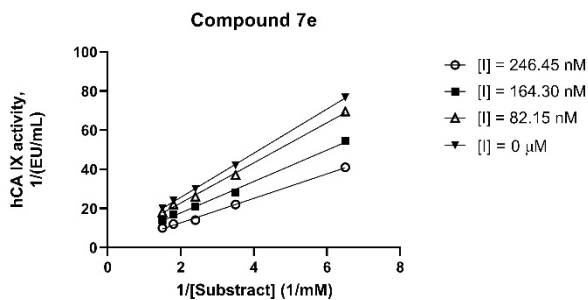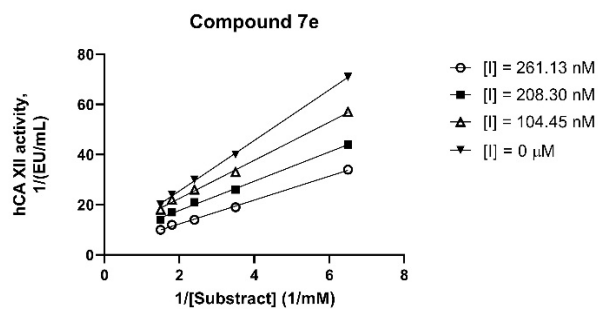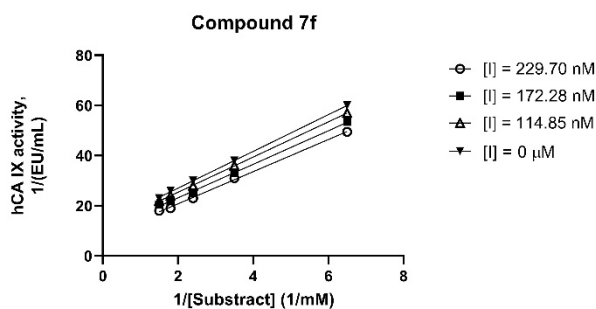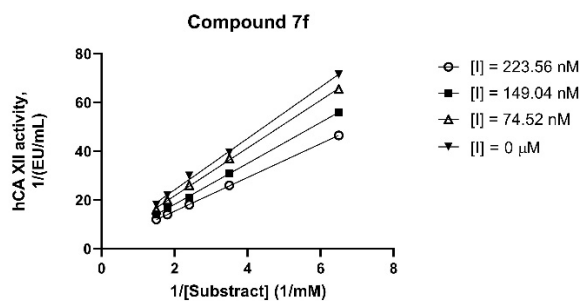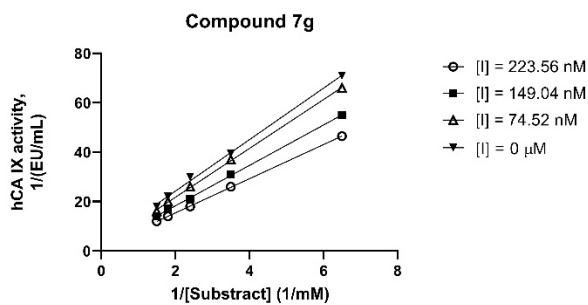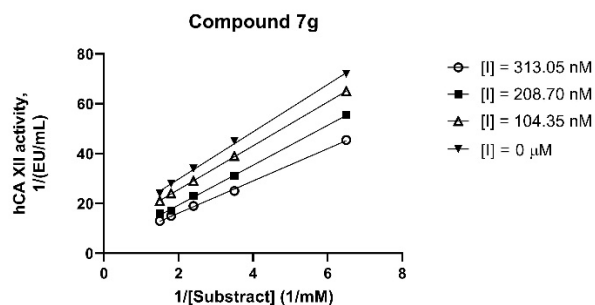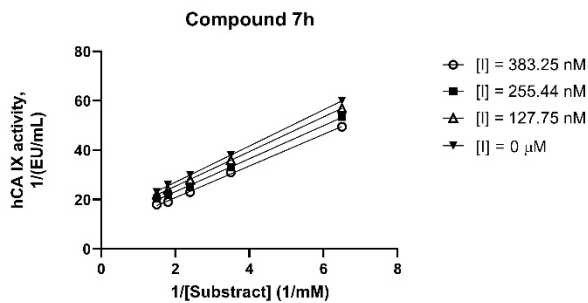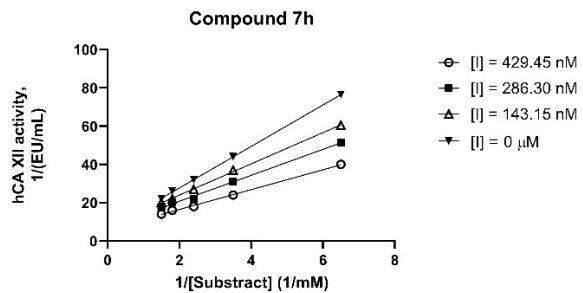

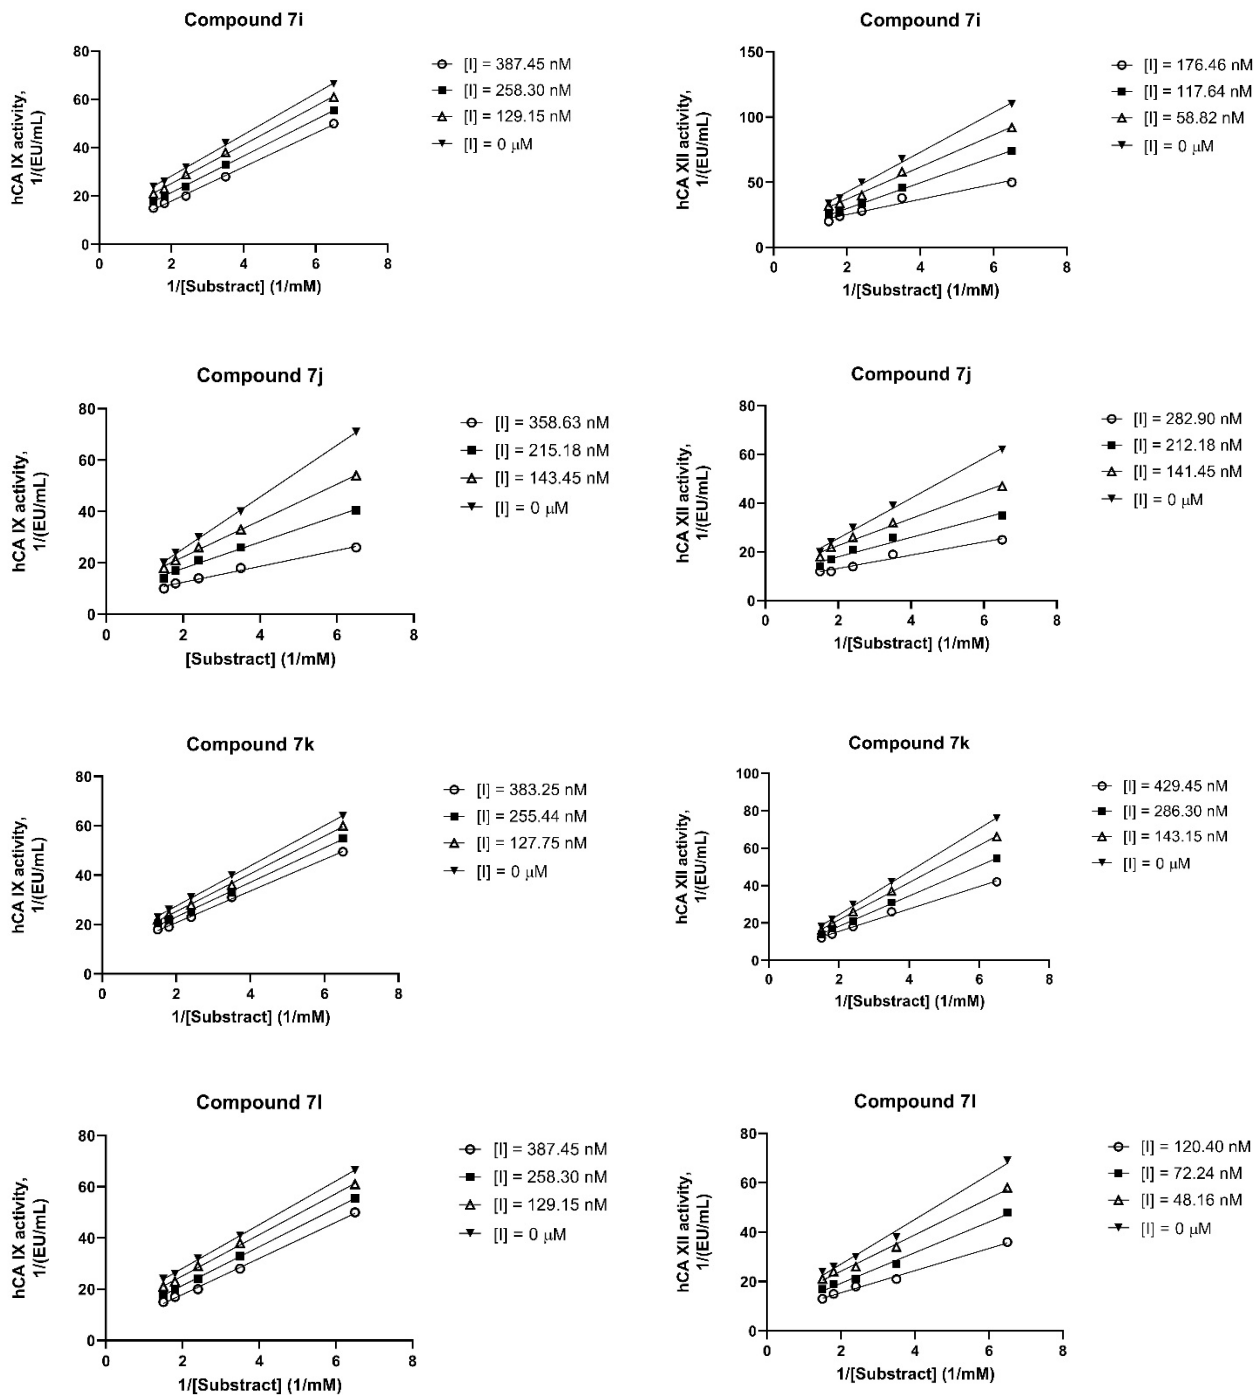

Figure S1. Lineweaver-Burk plots for compounds 7a-m.



### 3. Molecular docking simulations

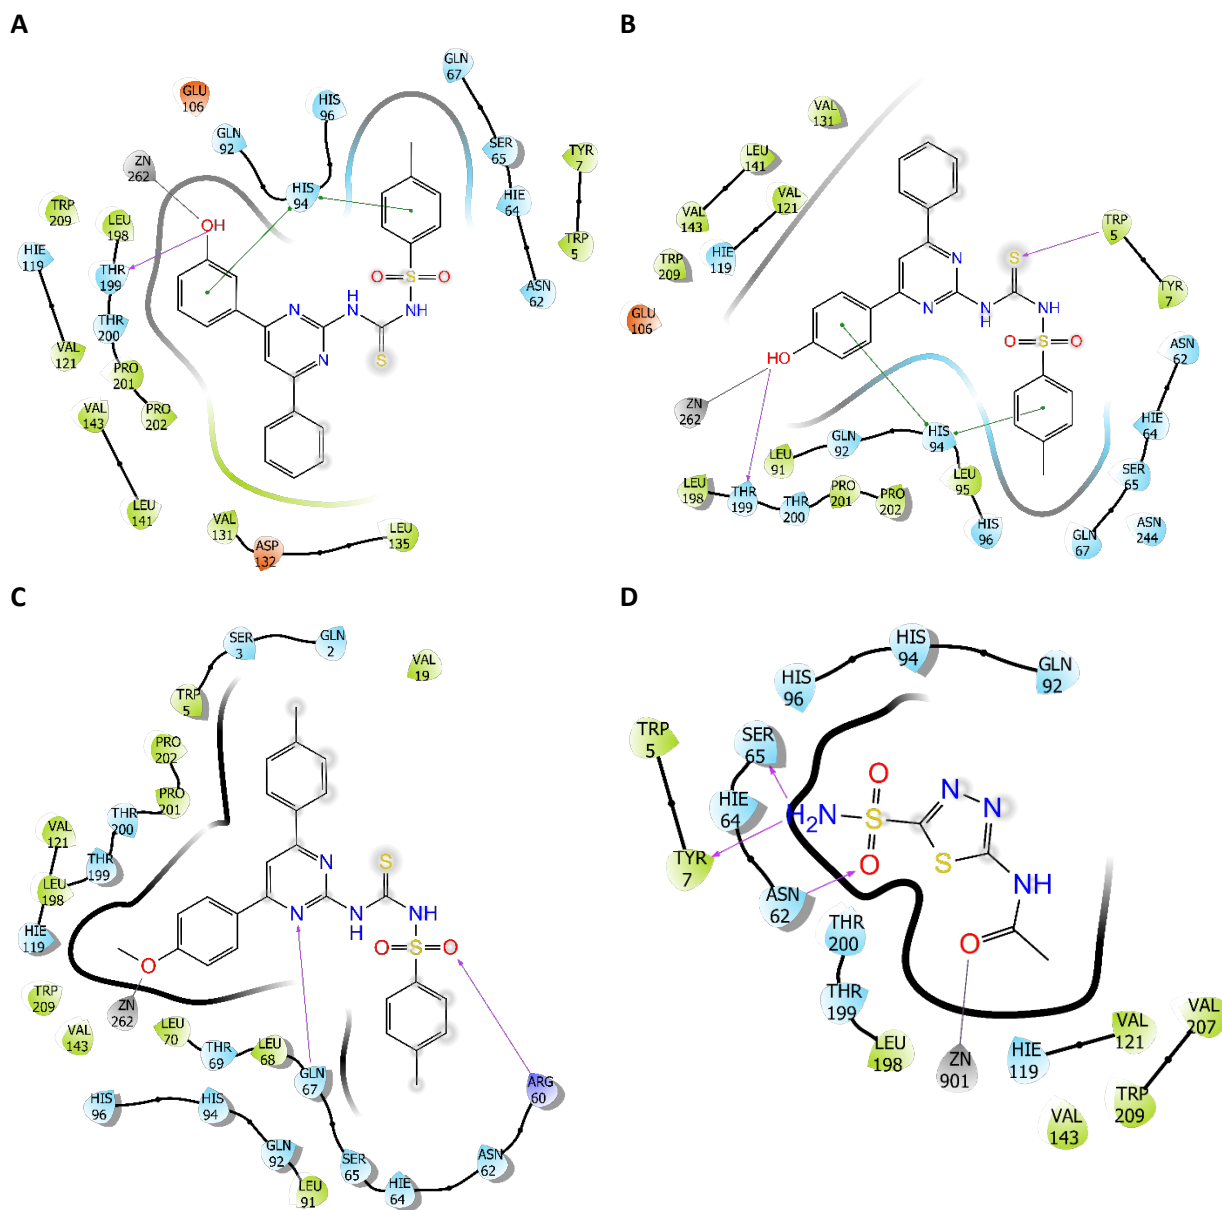

**Figure S2.** 2D Representations for the interacting mode and the settlement of the most potent sulphonyl thiourea ligands in the active pocket of enzyme 3IAI. The hydrogen bonds,  $\pi$ - $\pi$  stacking and interaction with zinc(II) ion were shown. (A) **7c** ( $R_1 = H, R_2 = 3-OH$ ), (B) **7d** ( $R_1 = H, R_2 = 4-OH$ ), **7g** ( $R_1 = 4-OMe, R_2 = 4-Me$ ), and co-crystal AZA.

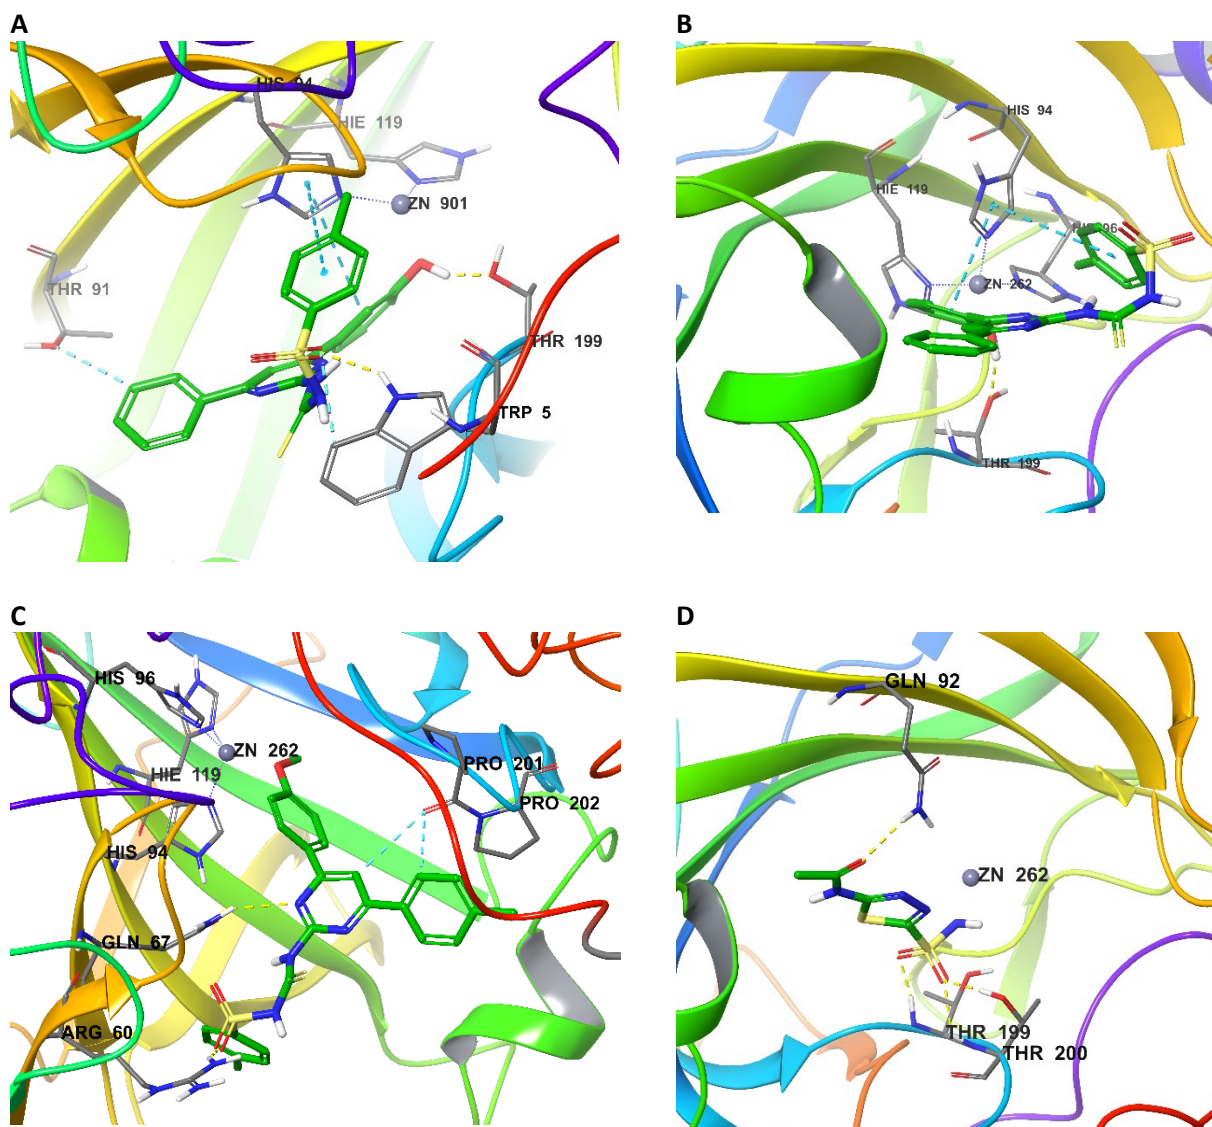

**Figure S3.** 3D Representation for the interacting mode and the settlement of the most potent sulphonyl thiourea ligands in the active pocket of enzyme 3IAI. The hydrogen bonds,  $\pi$ - $\pi$  stacking and interaction with zinc(II) ion were shown. (A) **7c** ( $R_1 = H$ ,  $R_2 = 3\text{-OH}$ ), (B) **7d** ( $R_1 = H$ ,  $R_2 = 4\text{-OH}$ ), **7g** ( $R_1 = 4\text{-OMe}$ ,  $R_2 = 4\text{-Me}$ ), and cocrystal AZA.

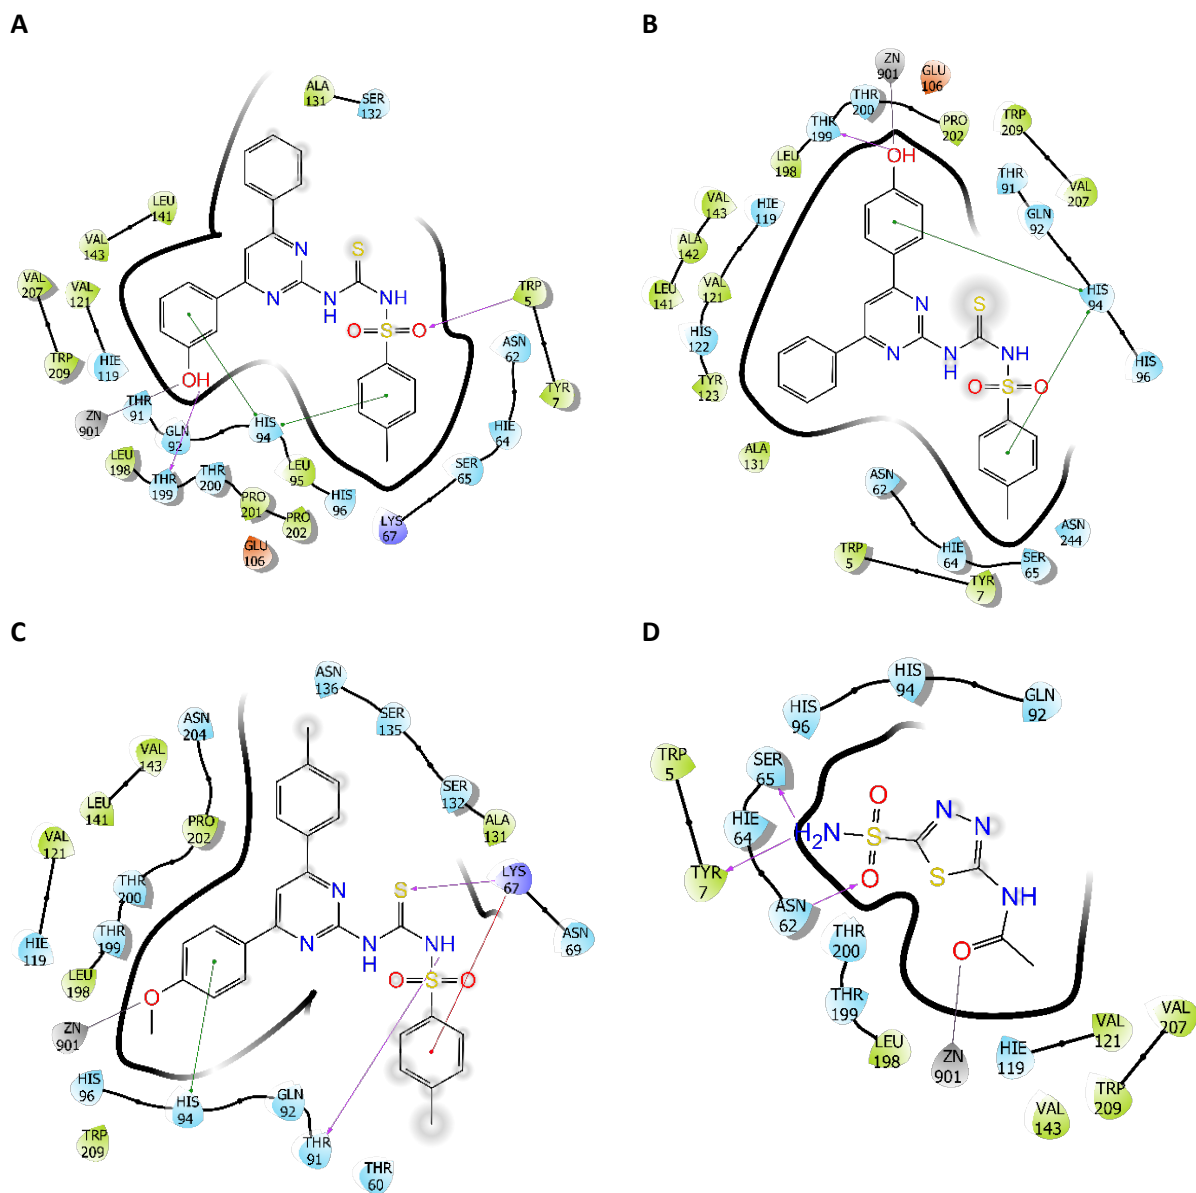

**Figure S4.** 2D Representations for the interacting mode and the settlement of the most potent sulphonyl thiourea ligands in the active pocket of enzyme 1JD0. The hydrogen bonds,  $\pi$ - $\pi$  stacking and interaction with zinc(II) ion were shown. (A) **7c** ( $R_1 = H, R_2 = 3\text{-OH}$ ), (B) **7d** ( $R_1 = H, R_2 = 4\text{-OH}$ ), **7g** ( $R_1 = 4\text{-OMe}, R_2 = 4\text{-Me}$ ), and cocrystal AZA.

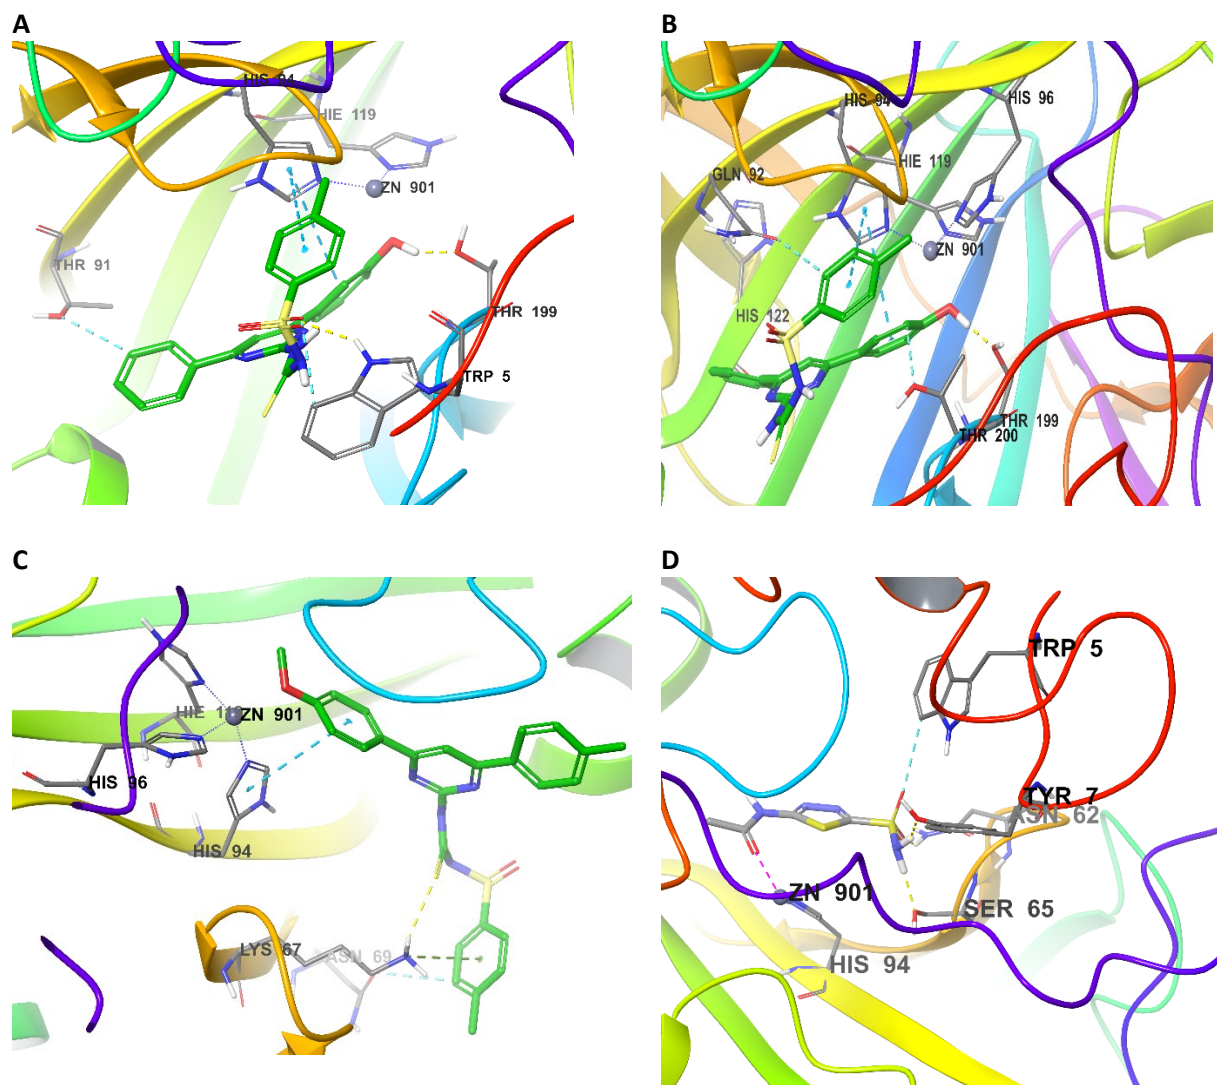

**Figure S5.** 3D Representation for the interacting mode and the settlement of the most potent sulphonyl thiourea ligands in the active pocket of enzyme 1JD0. The hydrogen bonds,  $\pi$ - $\pi$  stacking and interaction with zinc(II) ion were shown. (A) **7c** ( $R_1 = H$ ,  $R_2 = 3\text{-OH}$ ), (B) **7d** ( $R_1 = H$ ,  $R_2 = 4\text{-OH}$ ), **7g** ( $R_1 = 4\text{-OMe}$ ,  $R_2 = 4\text{-Me}$ ), and cocrystal AZA.

#### 4. HPLC, NMR, and MS spectra of synthesized of 2-aminodiarylpyrimidine sulphonyl thiourea derivatives (7a-m)

*N*-((4,6-Diphenylpyrimidin-2-yl)carbamothioyl)-4-methylbenzenesulphonamide (7a)

| No. | RT    | Area (%) | Concentration (%) | BC  |
|-----|-------|----------|-------------------|-----|
| 1   | 0.233 | 117269   | 0.979             | BV  |
| 2   | 0.733 | 310345   | 2.590             | VV  |
| 3   | 1.253 | 6941     | 0.058             | VB  |
| 4   | 1.813 | 11543559 | 96.355            | TBB |
| 5   | 3.020 | 2091     | 0.017             | BB  |
|     |       | 11980205 | 100.00            |     |

mV

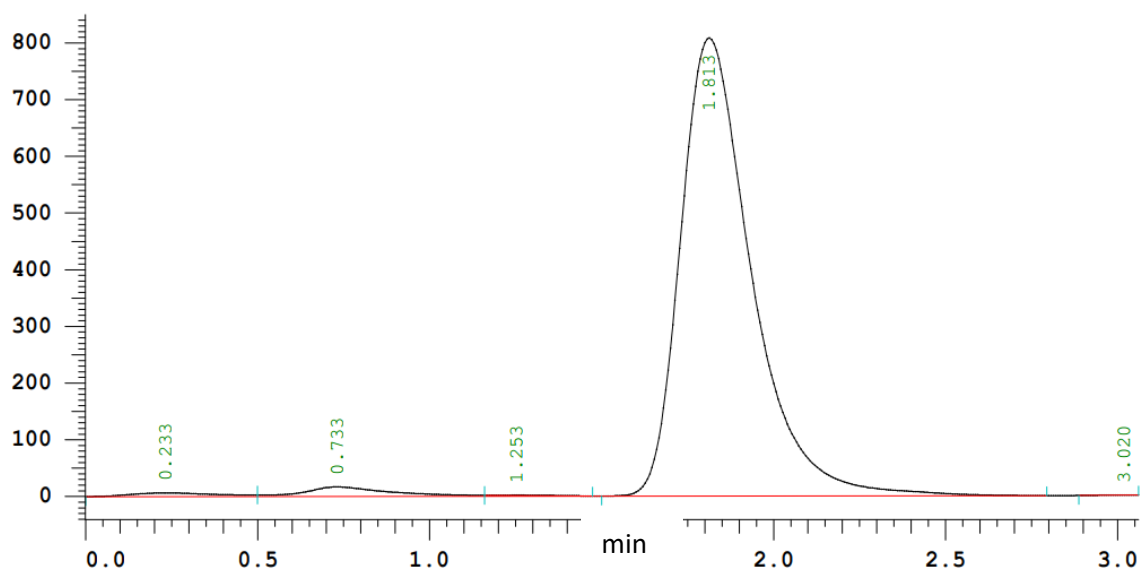

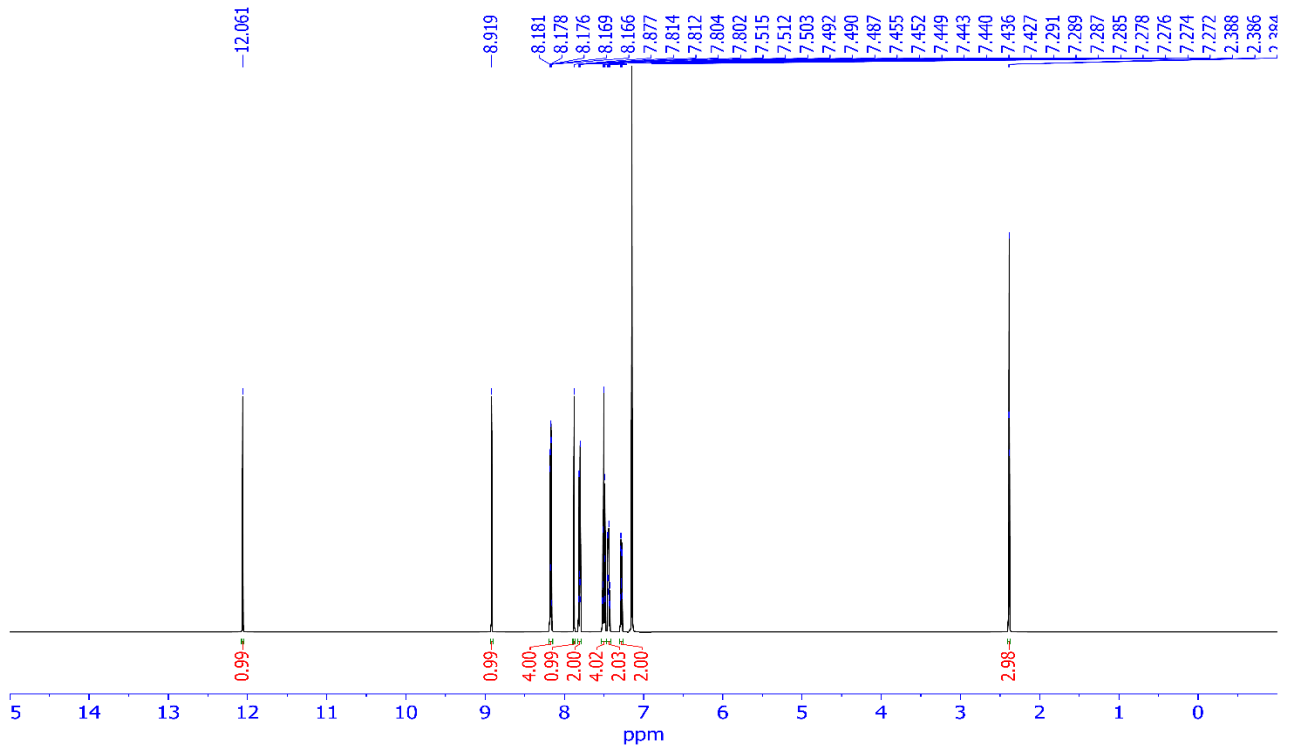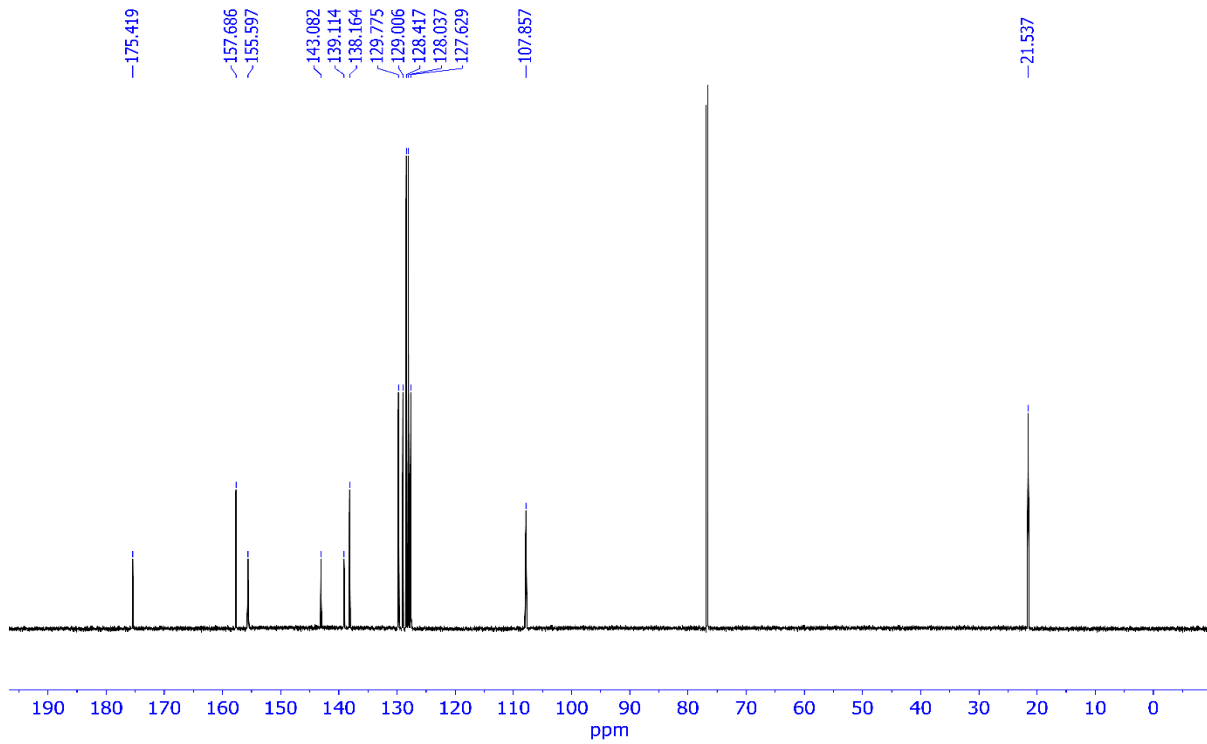

5b\_200506135522 #416 RT: 4.82 AV: 1 NL: 1.34E5  
 T: ITMS + c ESI Full ms [50.00-2000.00]

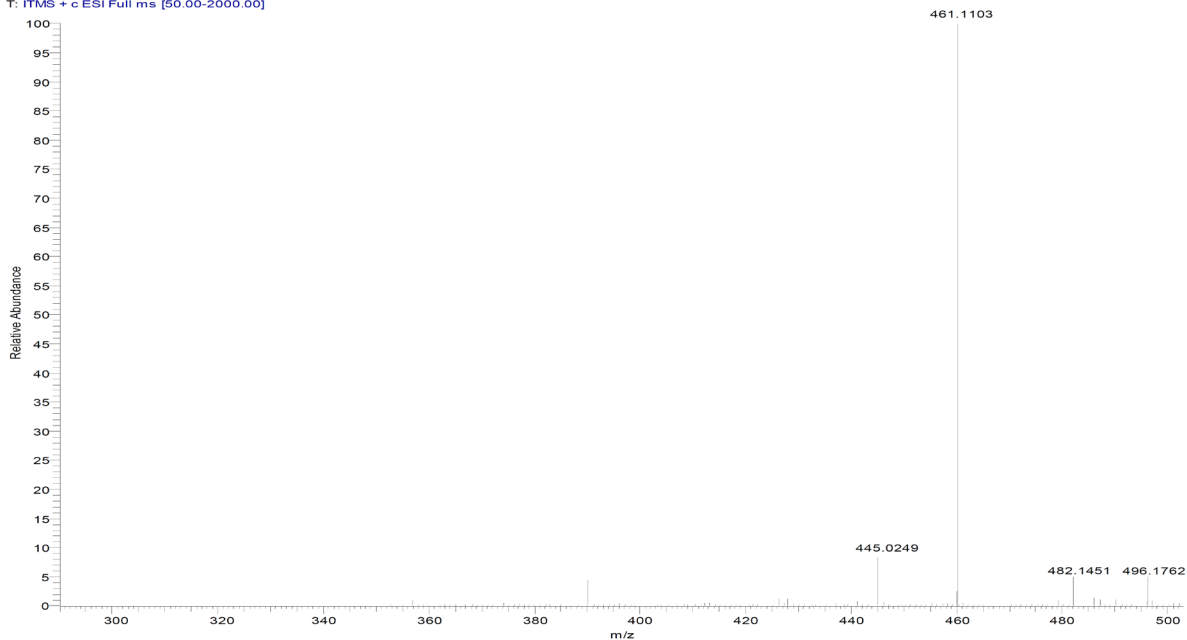

*N-((4-(4-Fluorophenyl)-6-phenylpyrimidin-2-yl)carbamothioyl)-4-methylbenzenesulphonamide (7b)*

| No. | RT    | Area (%) | Concentration (%) | BC  |
|-----|-------|----------|-------------------|-----|
| 1   | 1.987 | 579340   | 2.964             | BV  |
| 2   | 3.060 | 18864396 | 96.529            | VV  |
| 3   | 4.013 | 8213     | 0.042             | TBB |
| 4   | 4.453 | 65138    | 0.333             | TBV |
| 5   | 4.813 | 16684    | 0.085             | TVV |
| 6   | 5.147 | 8858     | 0.045             | TVB |
|     |       | 19542647 | 100.00            |     |

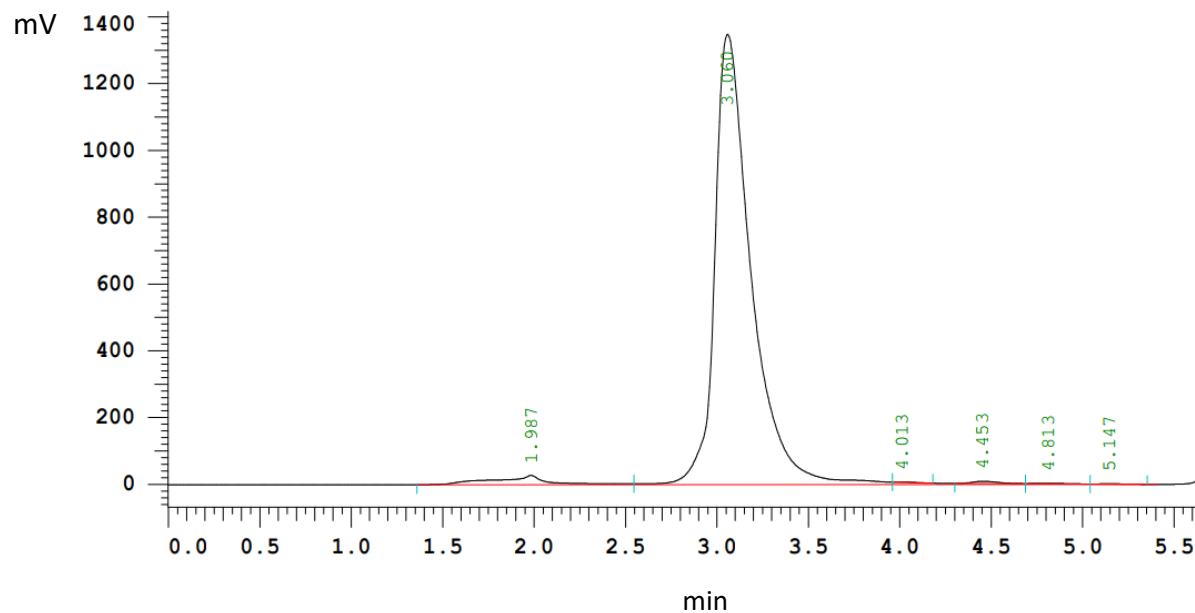

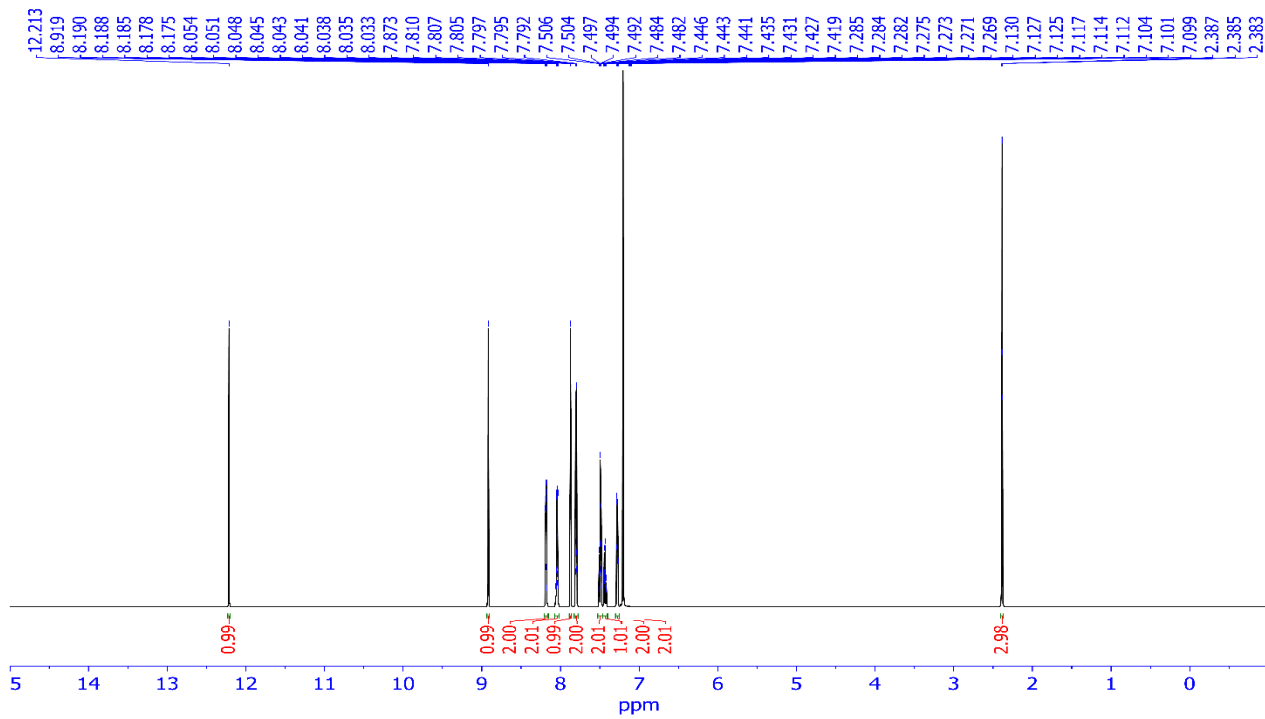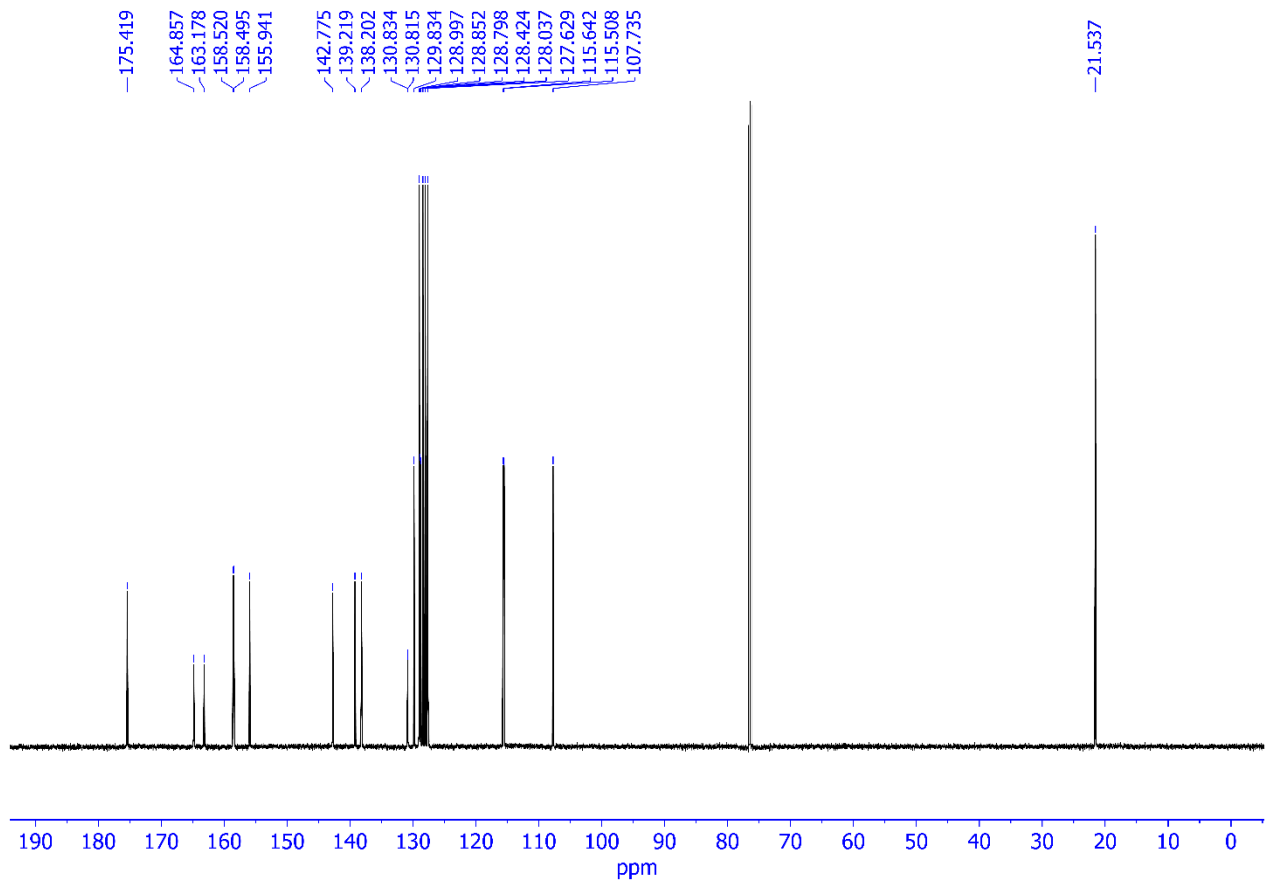



6D\_200506135522 #127 RT: 1.27 AV: 1 NL: 1.73E5  
T: ITMS + c ESI Full ms [50.00-2000.00]

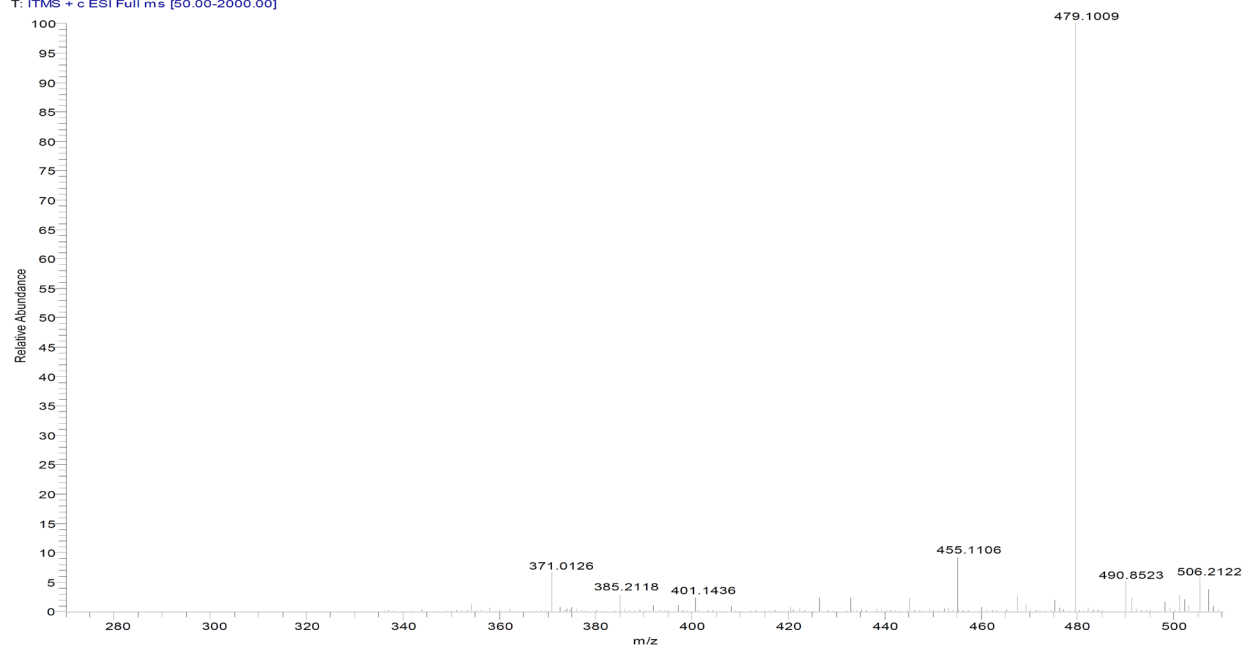

*N*-((4-(3-Hydroxyphenyl)-6-phenylpyrimidin-2-yl)carbamothioyl)-4-methylbenzenesulphonamide  
(7c)

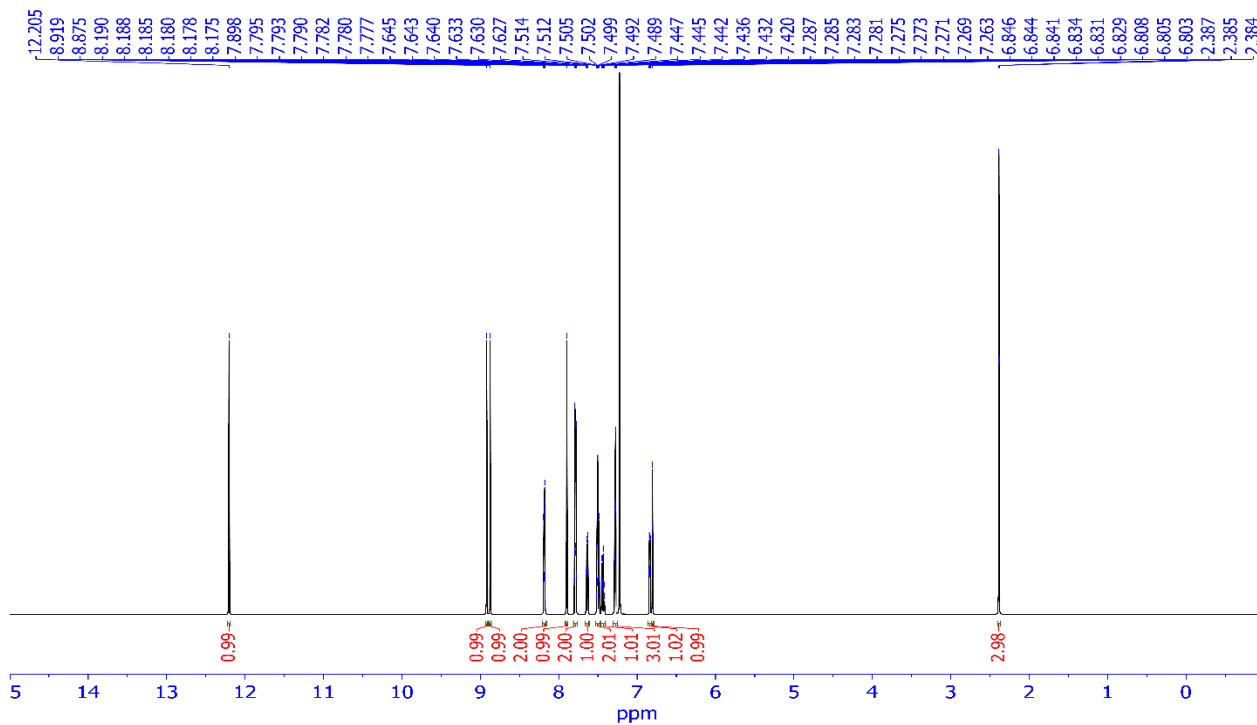

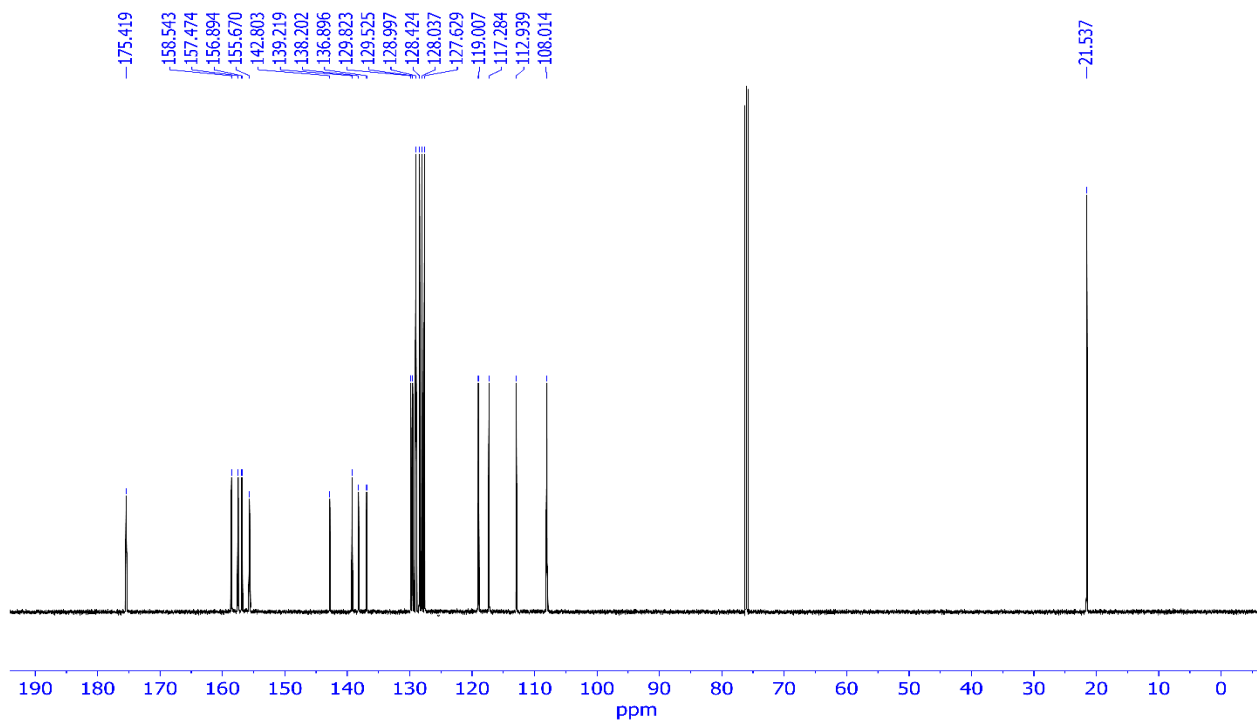

6D\_200506135522 #127 RT: 1.27 AV: 1 NL: 1.73E5  
T: [TMS + c ESI Full ms [50.00-2000.00]]

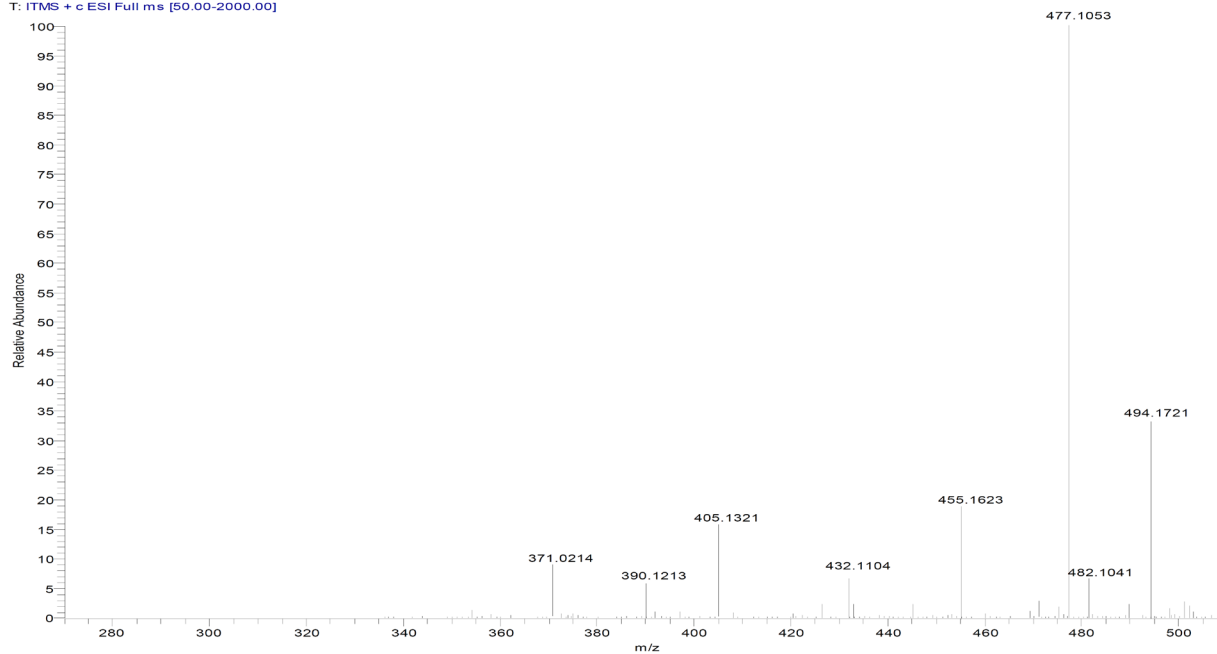

*N*-((4-(4-Hydroxyphenyl)-6-phenylpyrimidin-2-yl)carbamothioyl)-4-methylbenzenesulphonamide  
(7d)

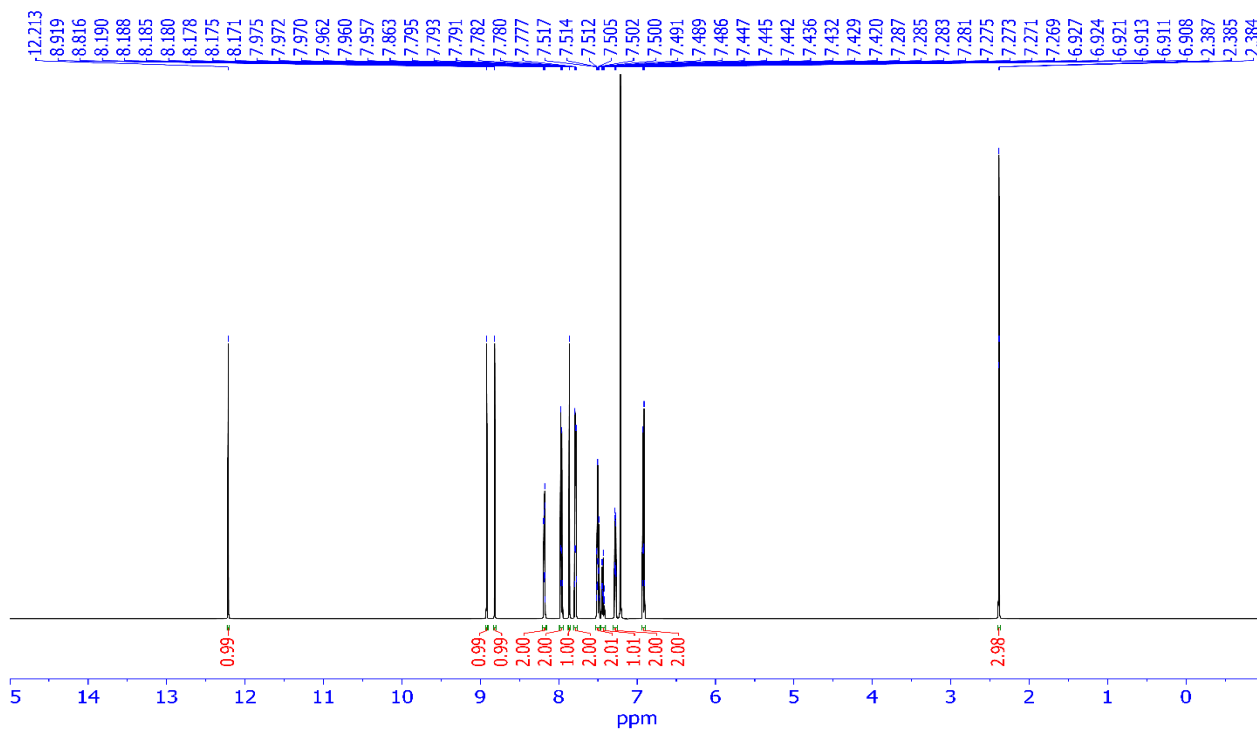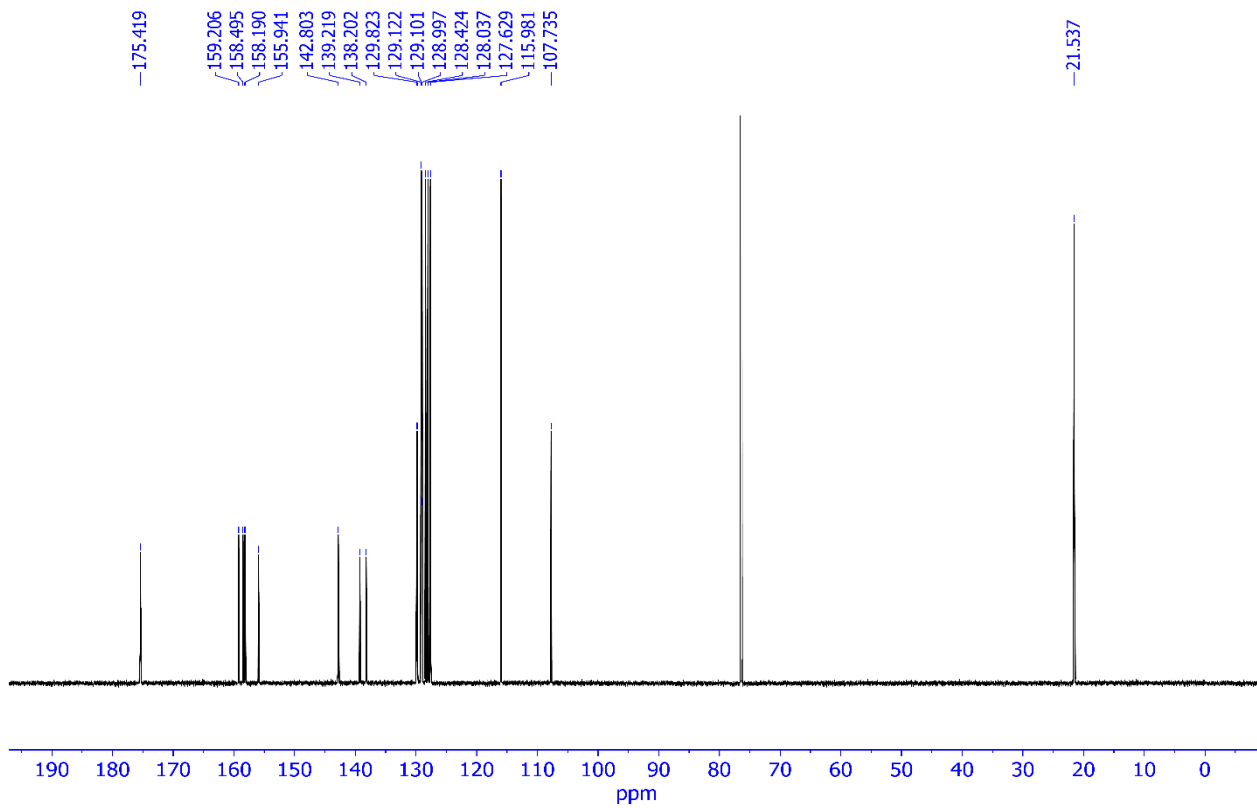

\_200506135521 #416 RT: 4.82 AV: 1 NL: 1.34E5 T:  
ITMS + c ESI Full ms [50.00-2000.00]

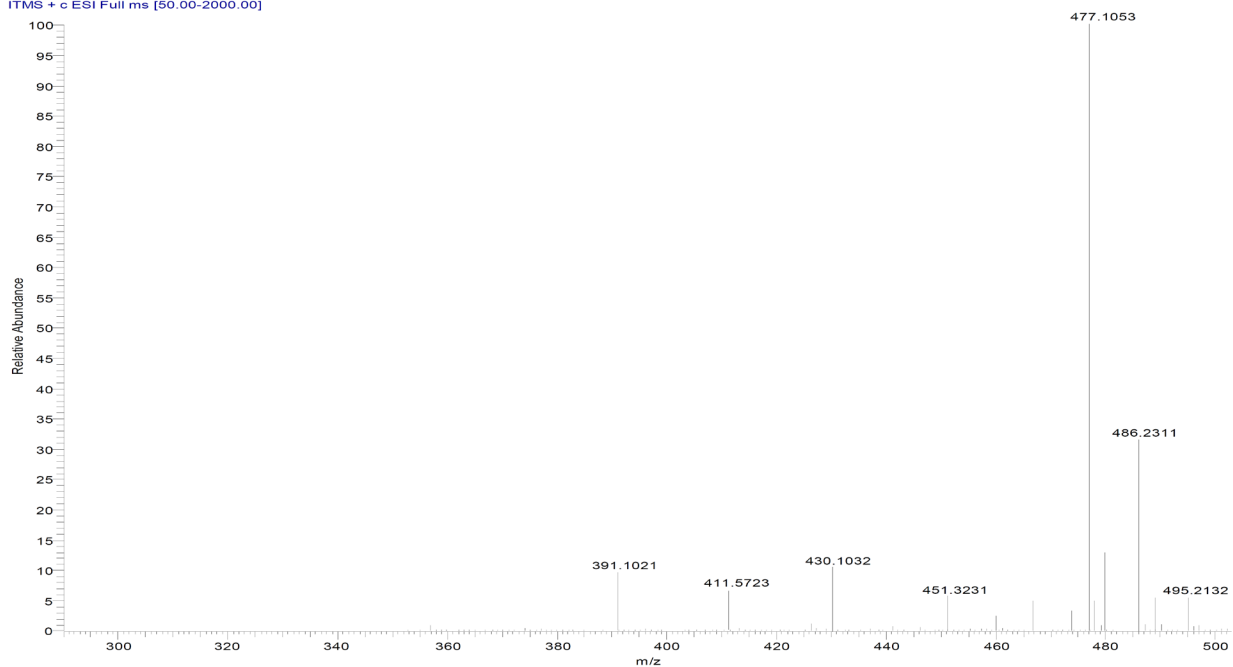

*N-((4-(4-Chlorophenyl)-6-(4-methoxyphenyl)pyrimidin-2-yl)carbamothioyl)-4-methylbenzenesulphonamide (7e)*

| No. | RT    | Area (%) | Concentration (%) | BC  |
|-----|-------|----------|-------------------|-----|
| 1   | 2.000 | 302963   | 1.384             | BV  |
| 2   | 2.940 | 102967   | 0.470             | VV  |
| 3   | 3.087 | 520051   | 2.421             | VV  |
| 4   | 3.307 | 20931637 | 95.623            | VV  |
| 5   | 5.013 | 22165    | 0.101             | TBB |
|     |       | 21889783 | 100.00            |     |

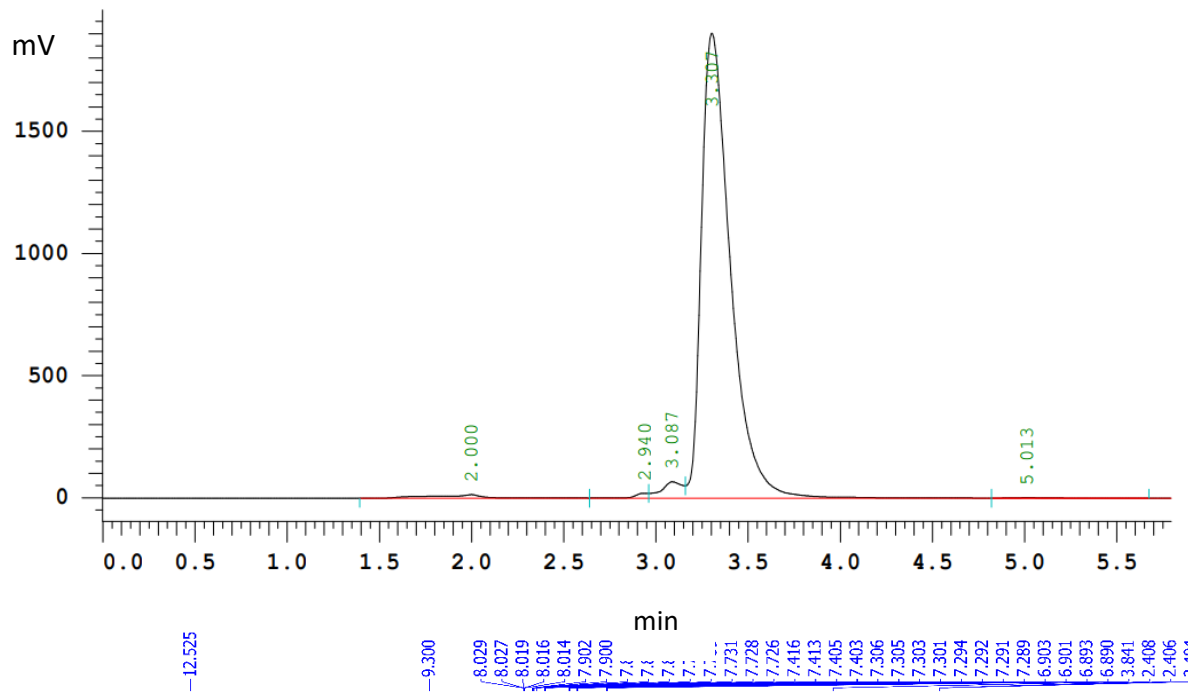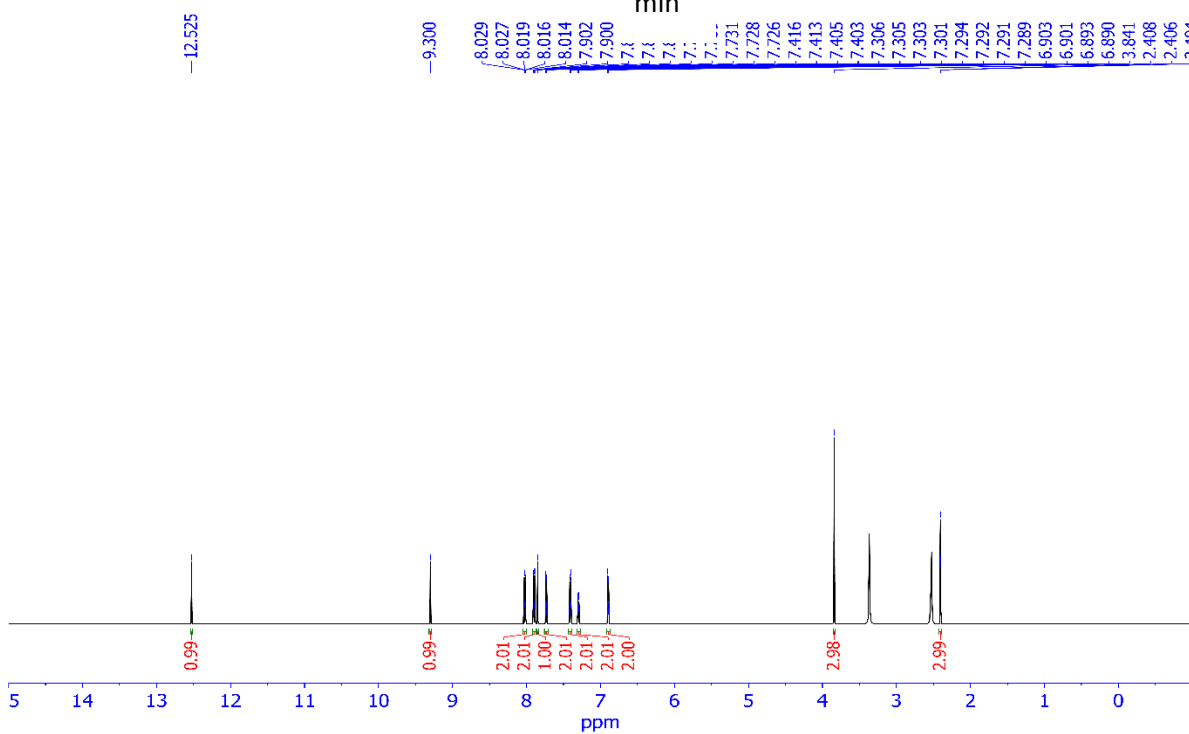

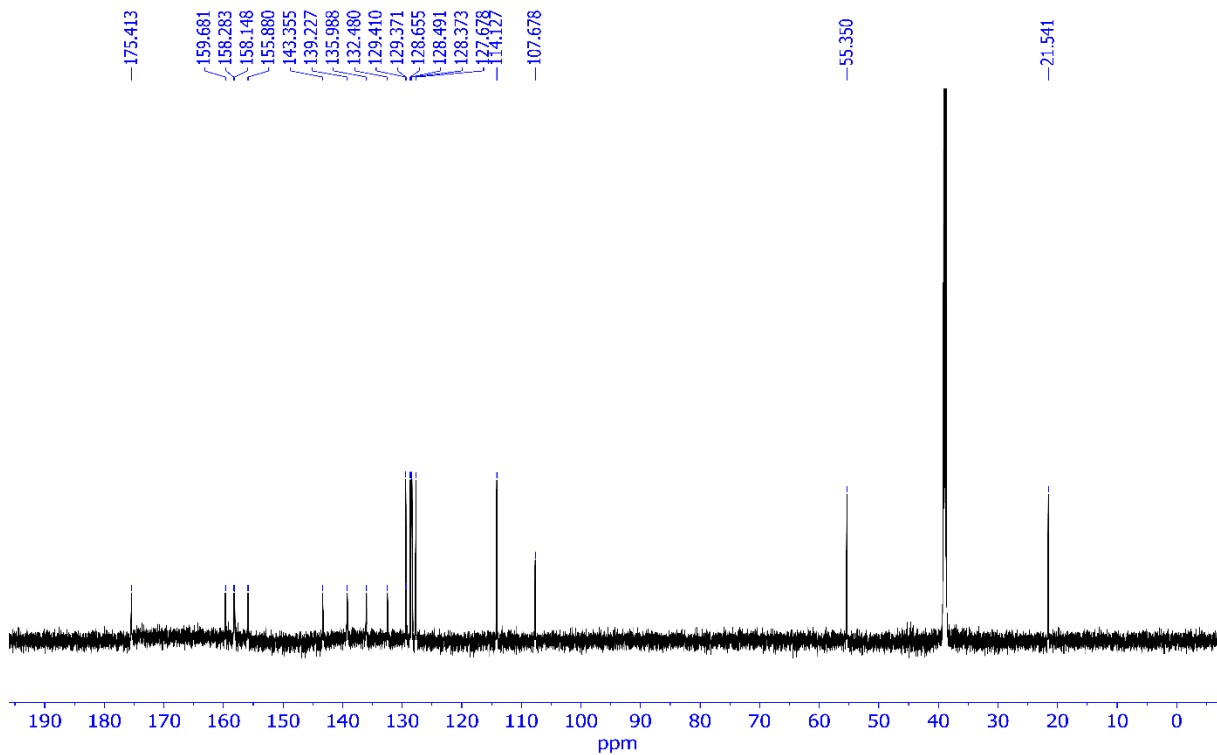

6D\_200506135522 #127 RT: 1.27 AV: 1 NL: 1.73E5  
 T: ITMS + c ESI Full ms [50.00-2000.00]

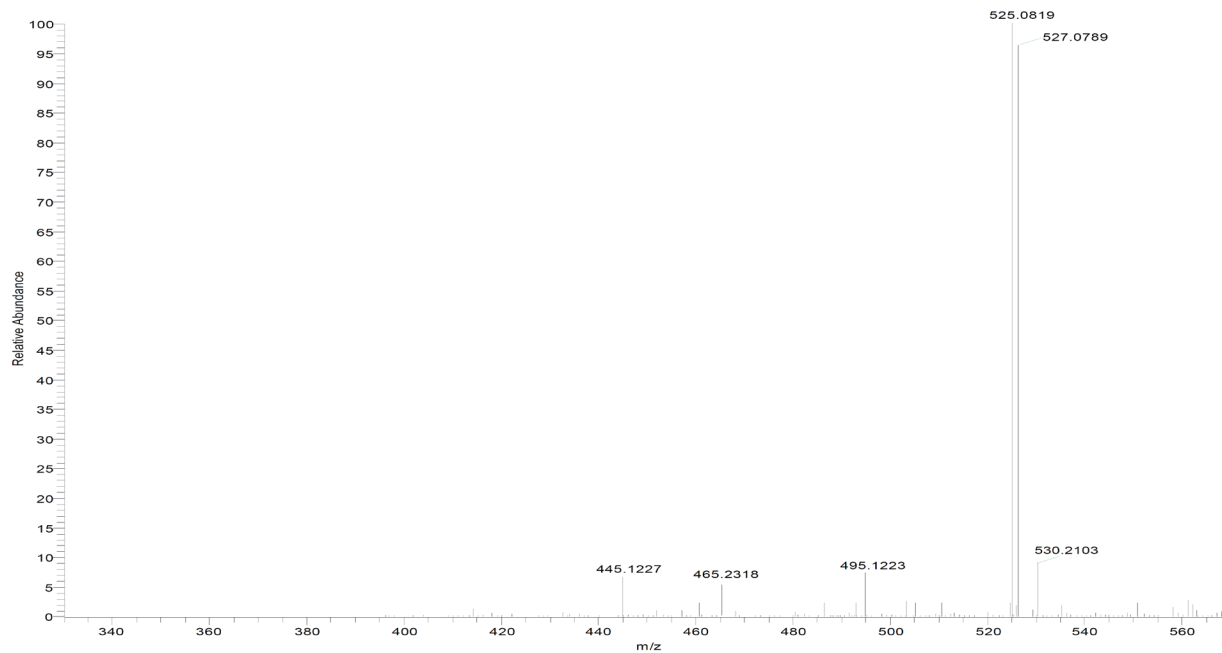

*N*-((4-(4-Bromophenyl)-6-(4-methoxyphenyl)pyrimidin-2-yl)carbamothioyl)-4-methylbenzenesulphonamide (**7f**)

| No. | RT    | Area (%) | Concentration (%) | BC  |
|-----|-------|----------|-------------------|-----|
| 1   | 1.727 | 139498   | 0.681             | BV  |
| 2   | 1.967 | 198369   | 0.968             | VV  |
| 3   | 3.127 | 20094728 | 98.101            | VV  |
| 4   | 3.753 | 51104    | 0.249             | TBB |
|     |       |          | 100.00            |     |

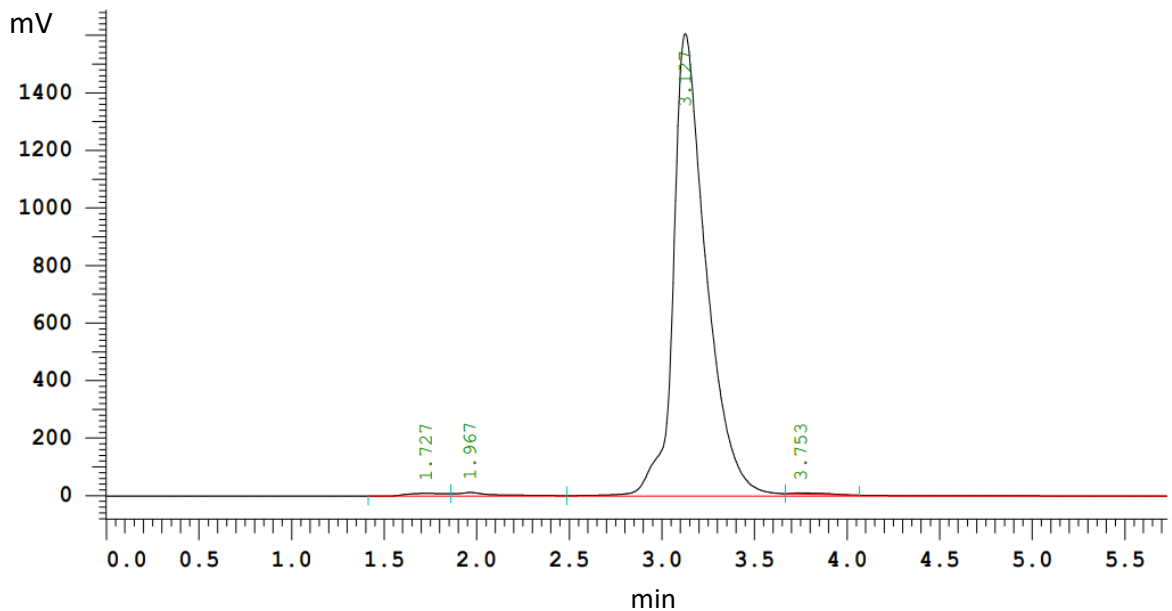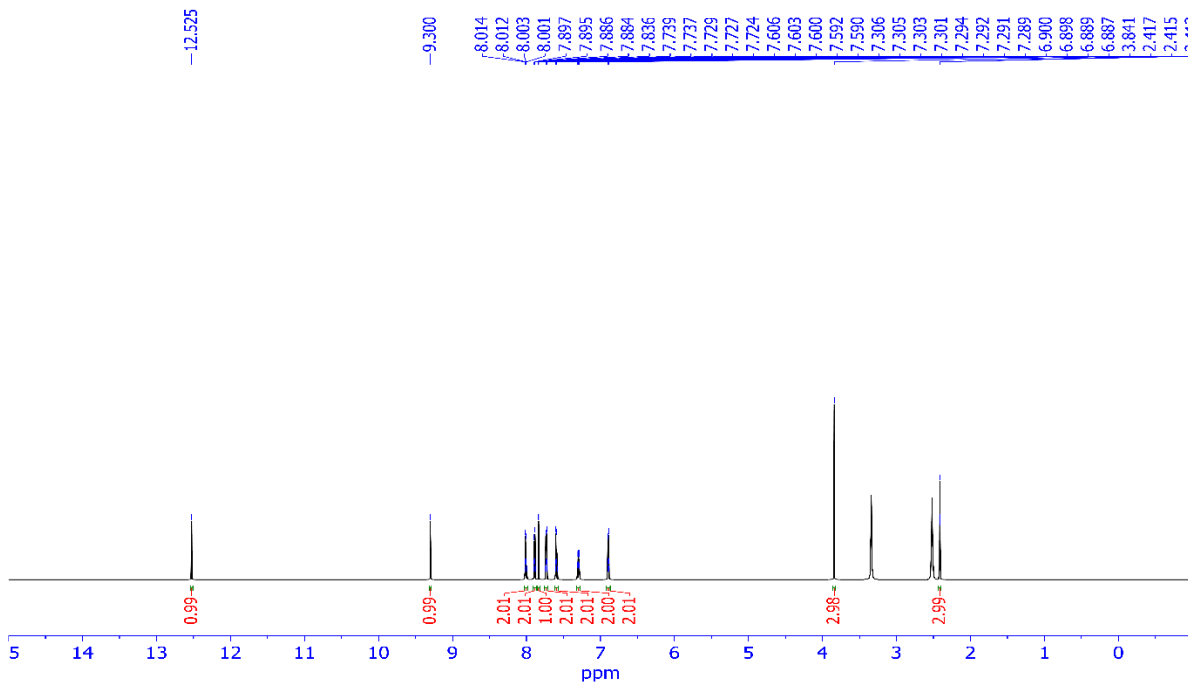

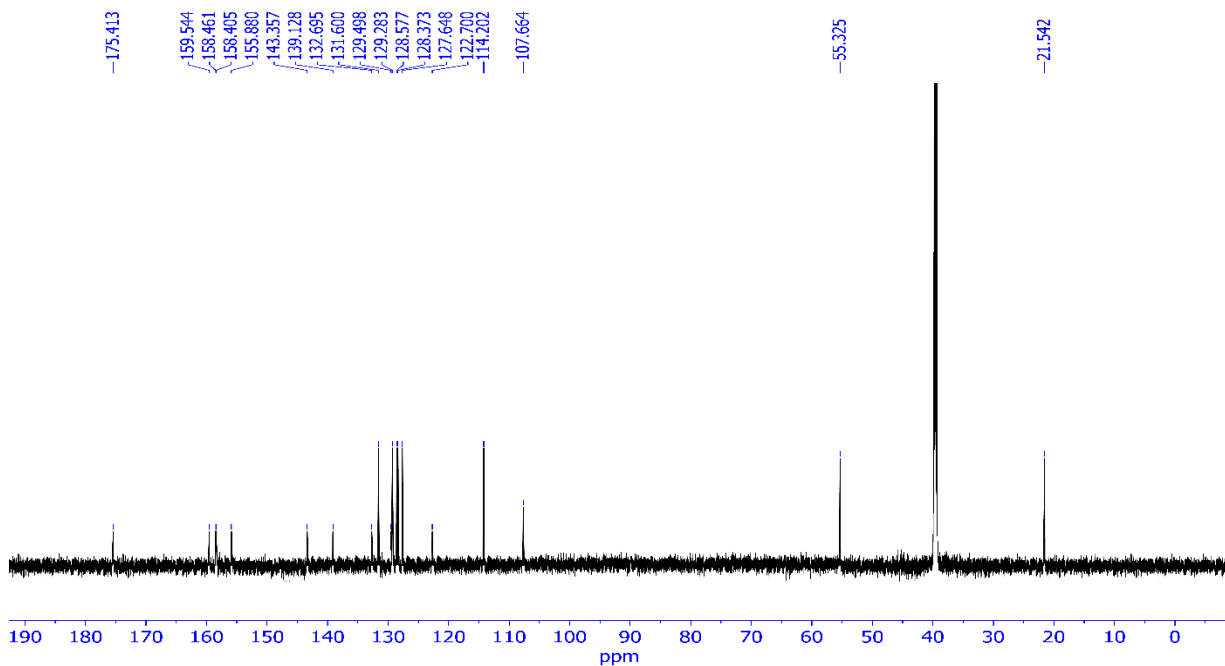

6D\_200506135522 #127 RT: 1.27 AV: 1 NL: 1.73E5  
 T: ITMS + c ESI Full ms [50.00-2000.00]

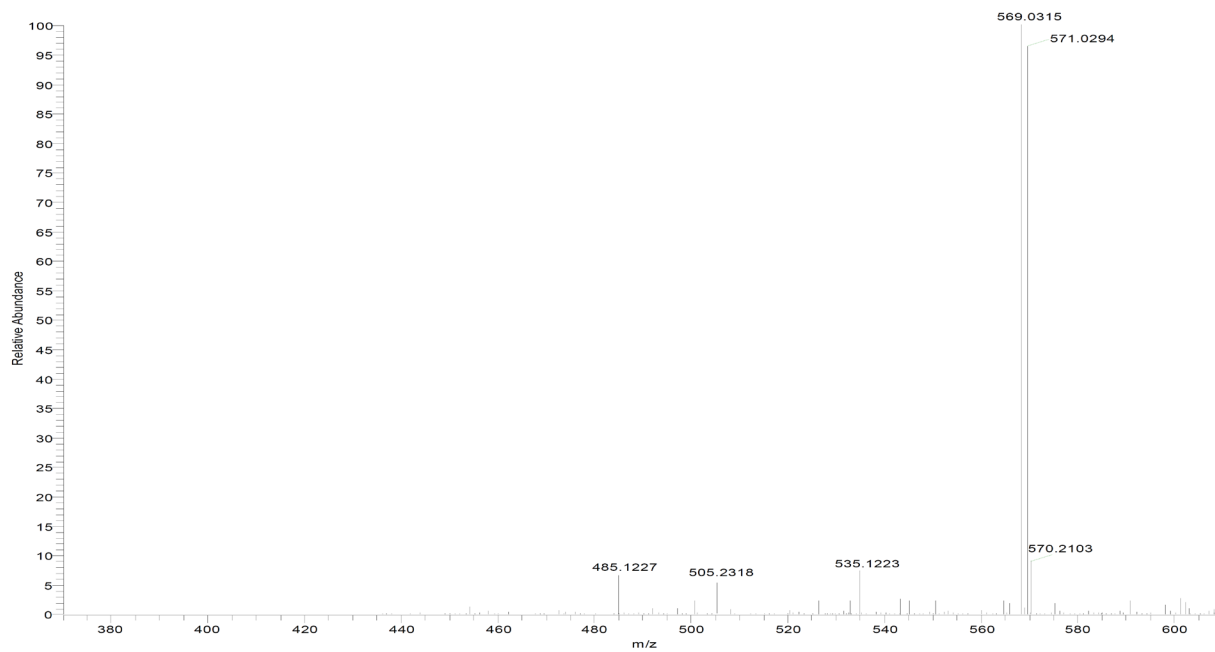



*N-((4-(4-Methoxyphenyl)-6-(4-methylphenyl)pyrimidin-2-yl)carbamothioyl)-4-methylbenzenesulphonamide (7g)*

| No. | RT    | Area (%) | Concentration (%) | BC  |
|-----|-------|----------|-------------------|-----|
| 1   | 1.773 | 80402    | 1.102             | BV  |
| 2   | 1.967 | 98089    | 1.345             | VV  |
| 3   | 3.133 | 7101267  | 97.364            | VV  |
| 4   | 3.747 | 137930   | 0.189             | TBB |
|     |       |          | 100.00            |     |

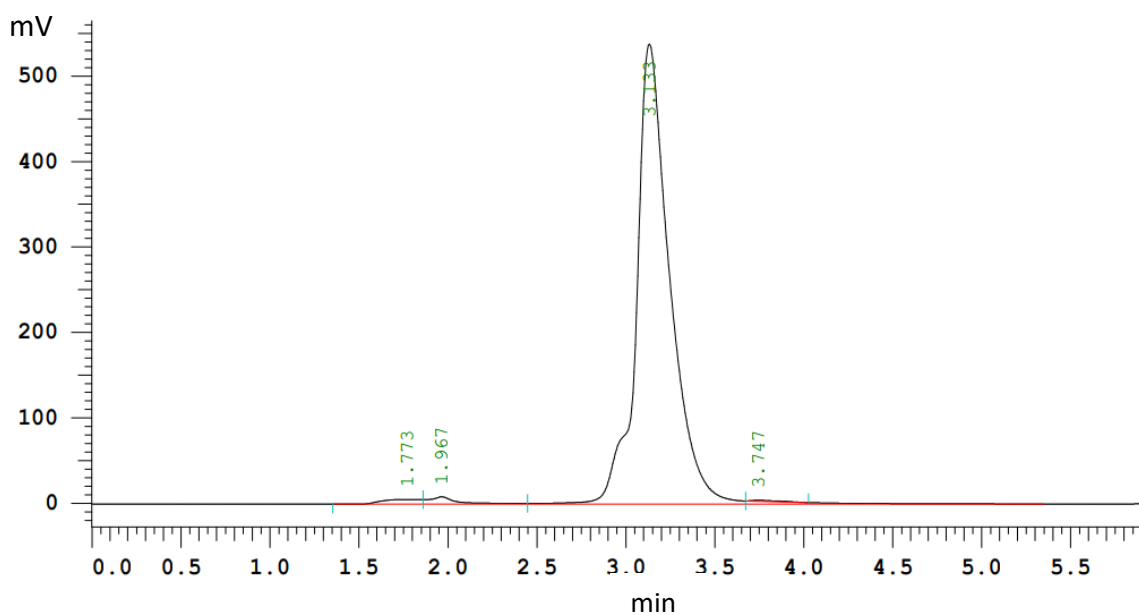

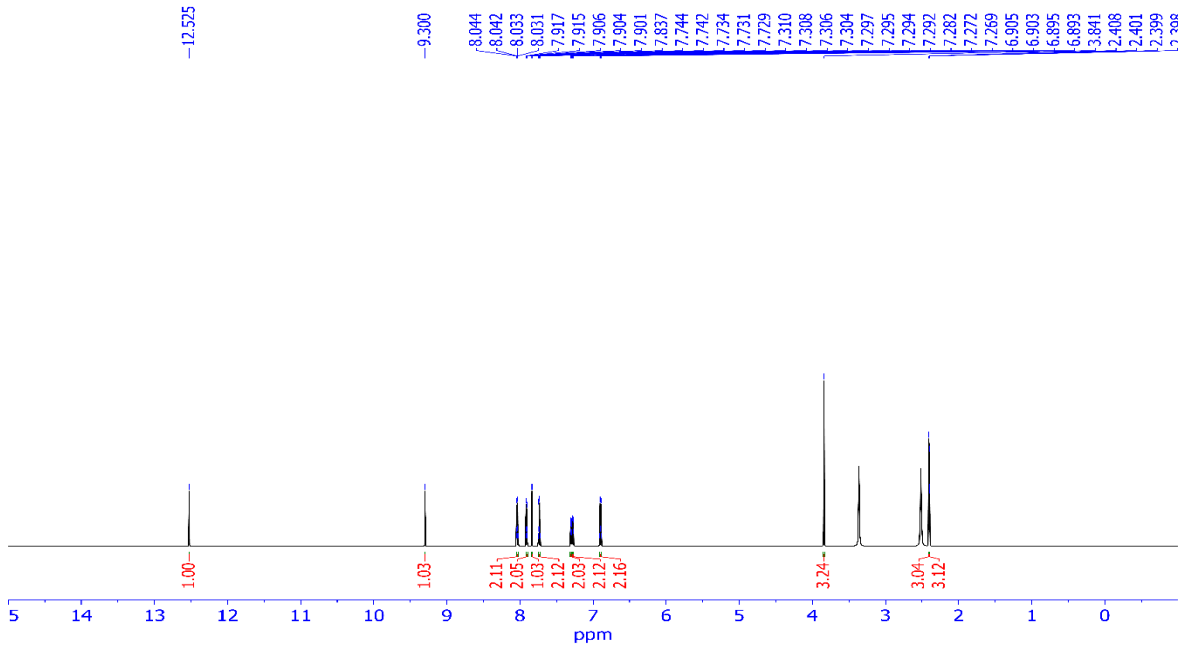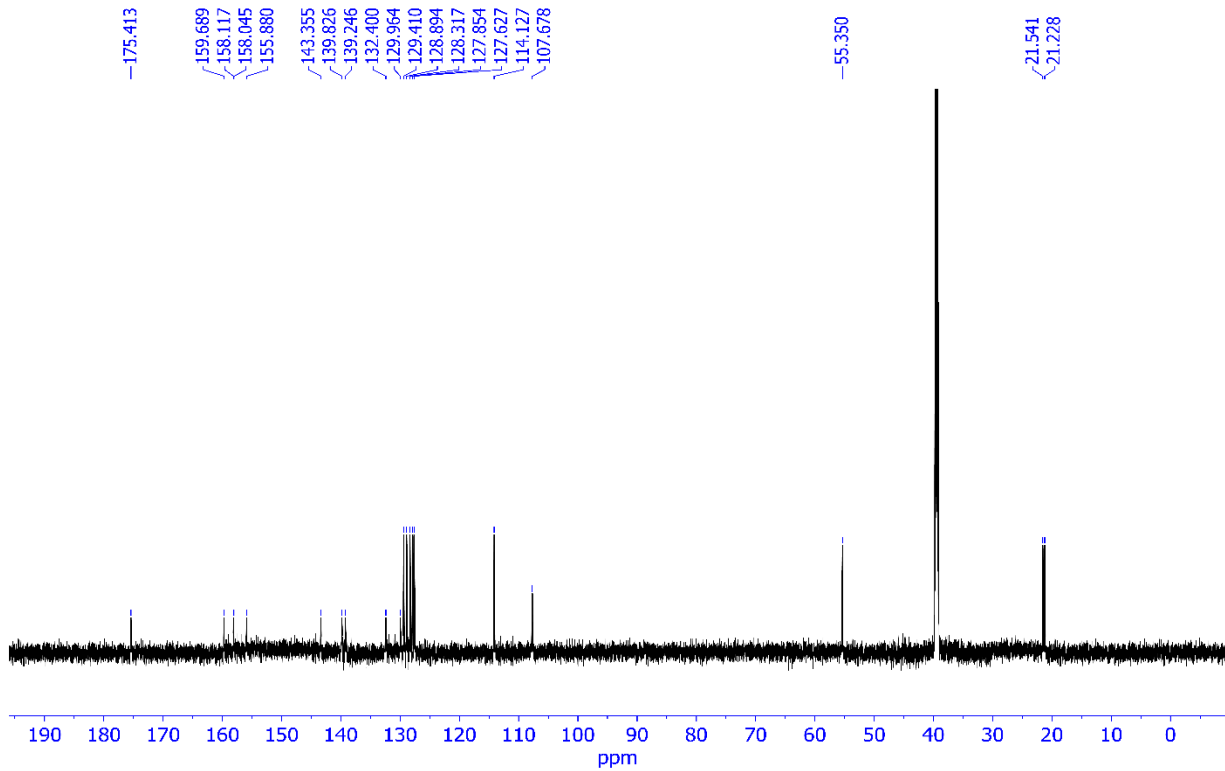

200506135521 #416 RT: 4.82 AV: 1 NL: 1.34E5 T:  
ITMS + c ESI Full ms [50.00-2000.00]

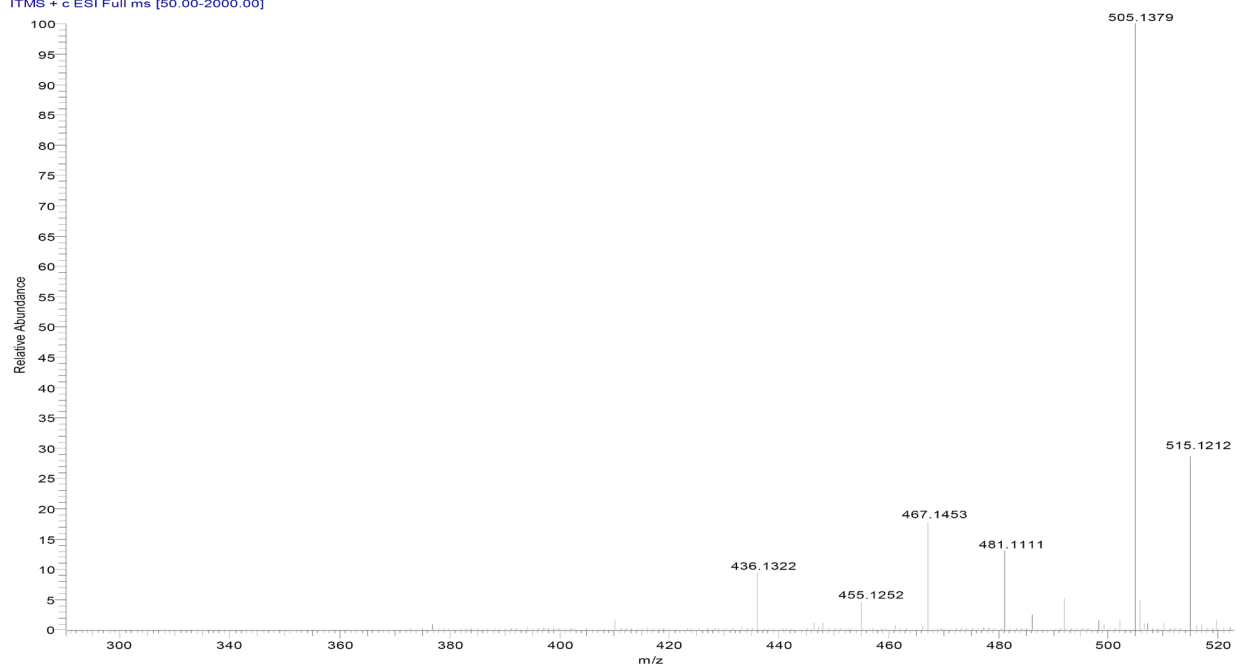

*N-((4-(4-Isopropylphenyl)-6-(4-methoxyphenyl)pyrimidin-2-yl)carbamothioyl)-4-methylbenzenesulphonamide (7h)*

| No. | RT    | Area (%) | Concentration (%) | BC  |
|-----|-------|----------|-------------------|-----|
| 1   | 0.500 | 826      | 0.008             | BB  |
| 2   | 1.760 | 812      | 0.008             | BB  |
| 3   | 3.433 | 10267216 | 99.973            | BB  |
| 4   | 4.913 | 1126     | 0.011             | TBB |
|     |       | 10269980 | 100.00            |     |

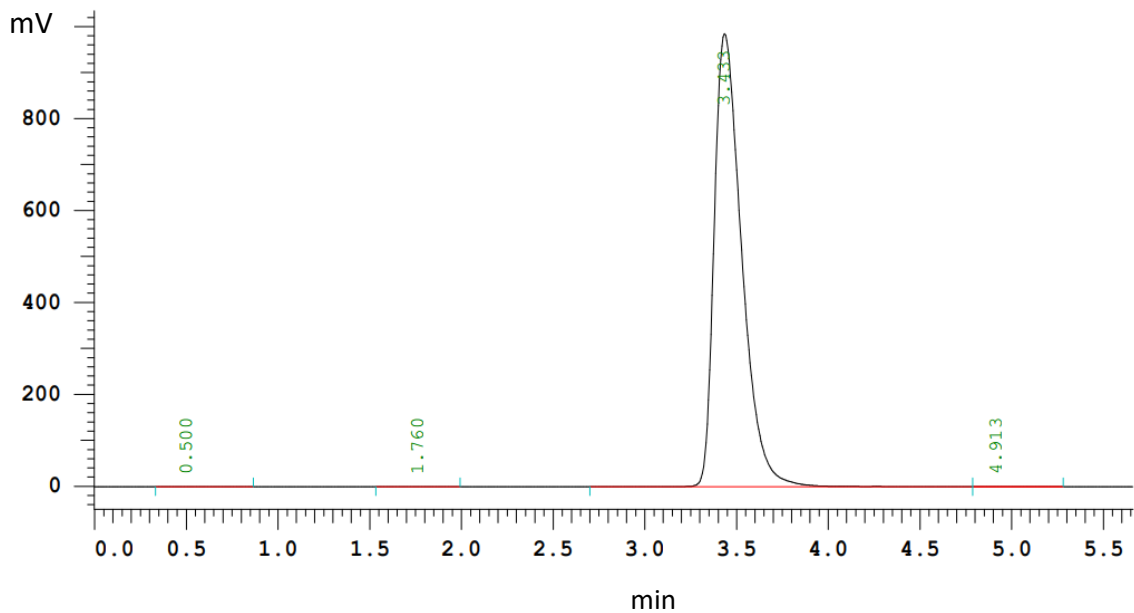

12.525  
9.300  
7.920  
7.917  
7.915  
7.906  
7.904  
7.901  
7.896  
7.893  
7.891  
7.882  
7.880  
7.876  
7.742  
7.739  
7.737  
7.729  
7.727  
7.724  
7.724  
7.730  
7.727  
7.720  
7.318  
7.308  
7.306  
7.304  
7.297  
7.295  
7.294  
7.292  
6.911  
6.908  
6.906  
6.898  
6.896  
6.893  
3.841  
2.987  
2.976  
2.966  
2.964  
2.953  
2.942  
2.942  
2.417  
2.415  
2.414  
1.289  
1.277

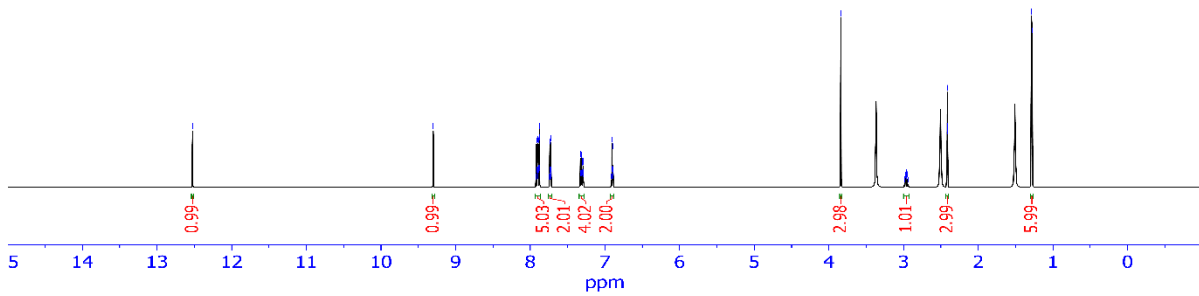

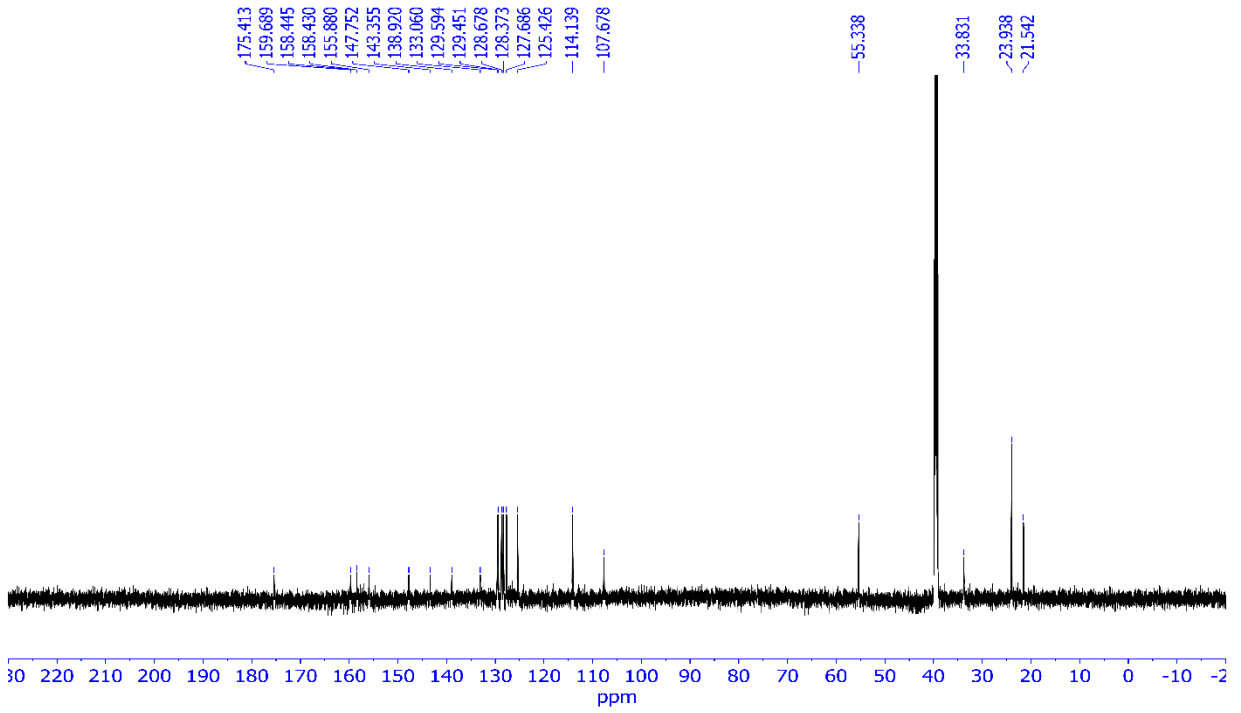

\_200506135521 #416 RT: 4.82 AV: 1 NL: 1.34E5 T:  
ITMS + c ESI Full ms [50.00-2000.00]

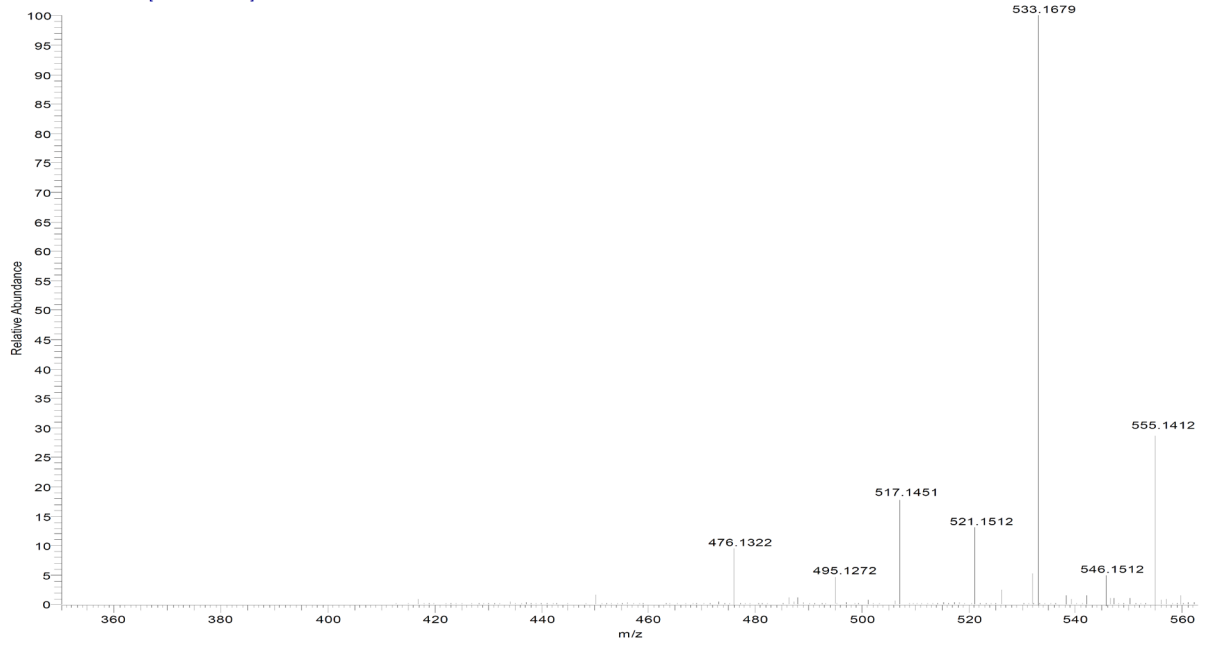

*N*-((4-(4-(Dimethylamino)phenyl)-6-(4-methoxyphenyl)pyrimidin-2-yl)carbamothioyl)-4-methylbenzenesulphonamide (**7i**)

| No. | RT    | Area (%) | Concentration (%) | BC |
|-----|-------|----------|-------------------|----|
| 1   | 1.340 | 1964     | 0.025             | BB |
| 2   | 1.767 | 9615     | 0.123             | BB |
| 3   | 3.313 | 7817217  | 99.852            | BB |
|     |       | 7828796  | 100.00            |    |

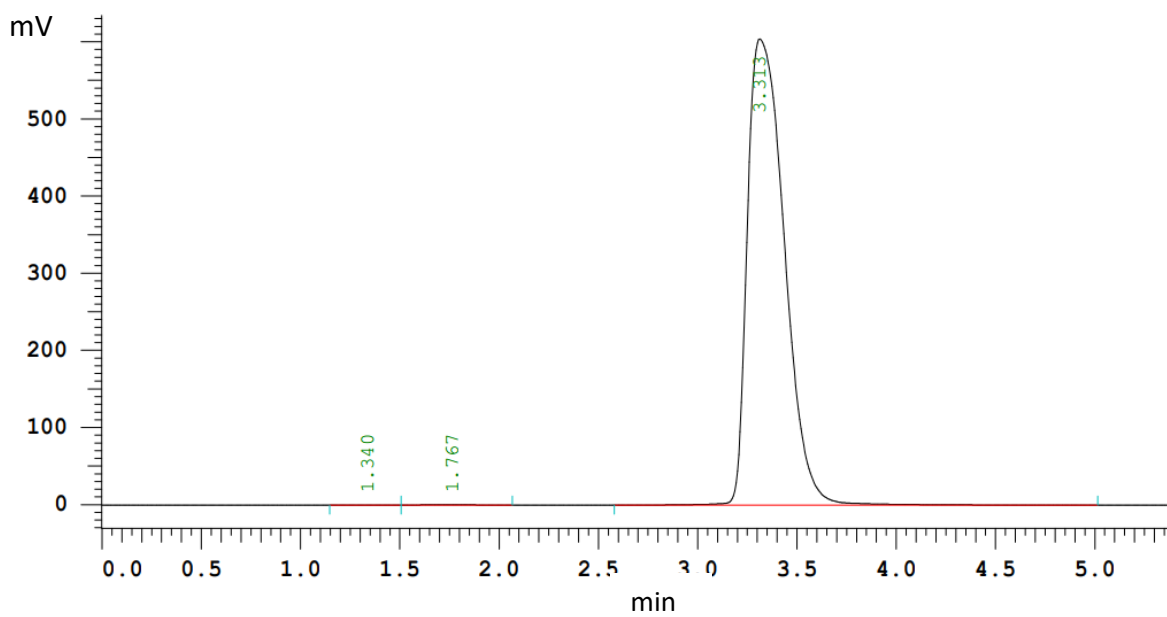

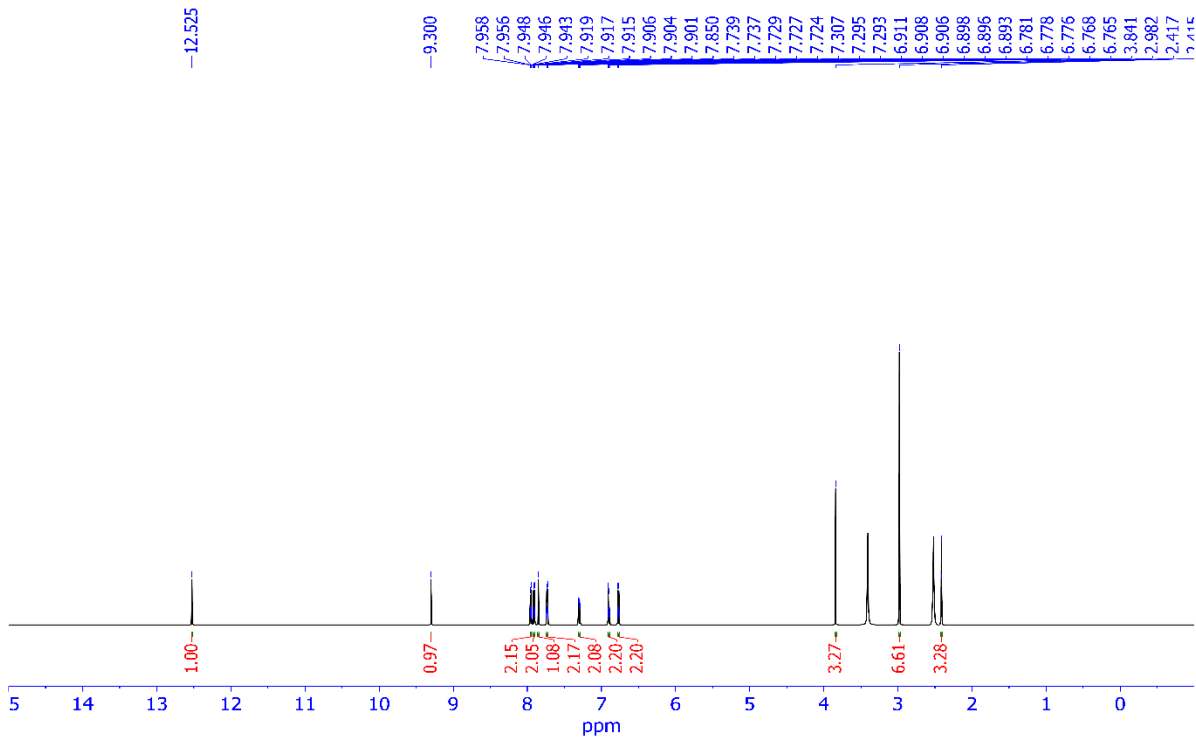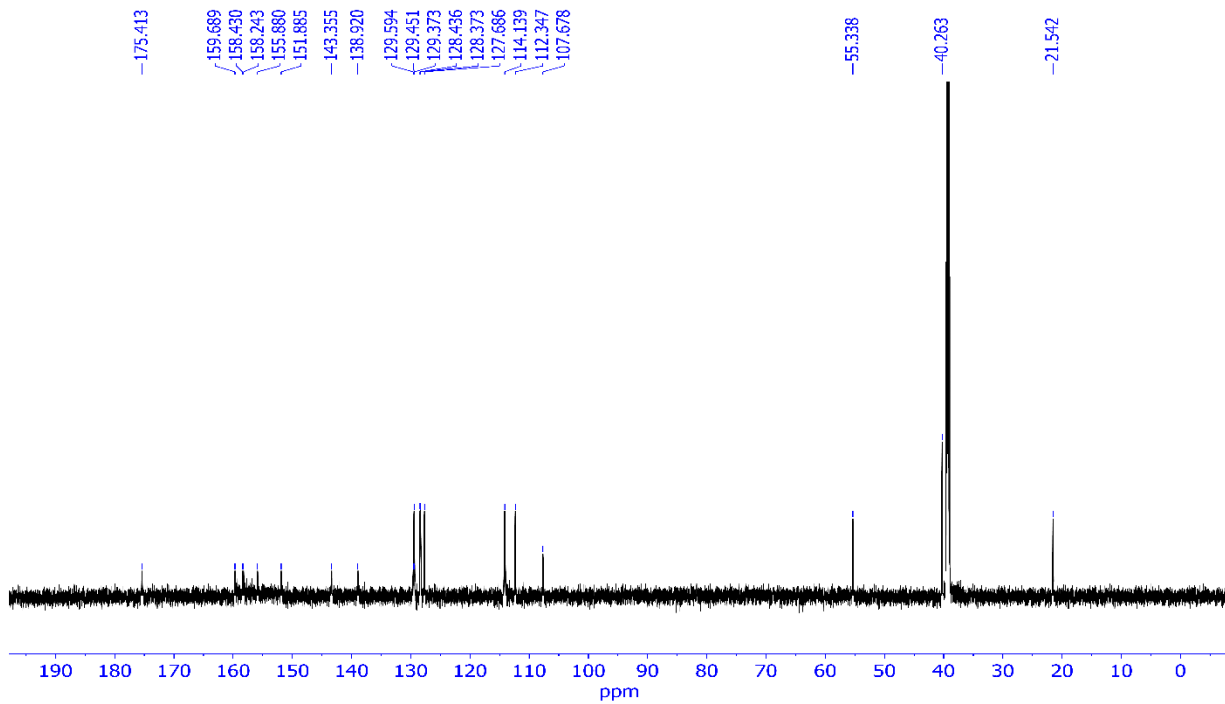

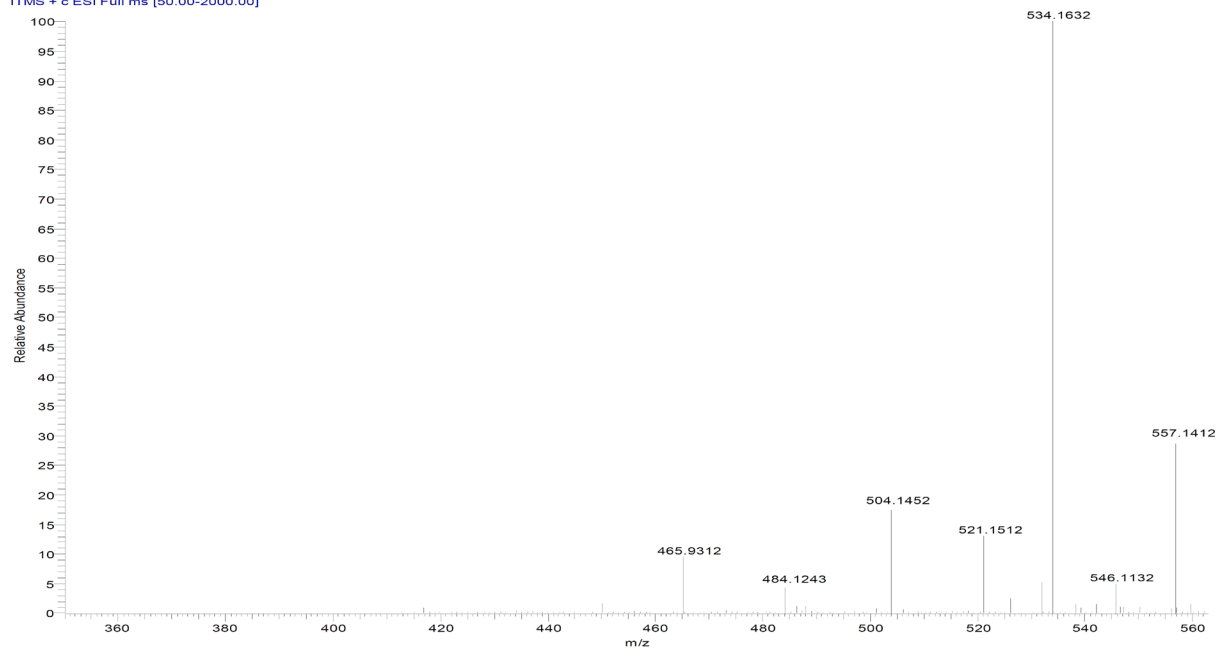

*N-((4-(4-Bromophenyl)-6-(4-methylphenyl)pyrimidin-2-yl)carbamothioyl)-4-methylbenzenesulphonamide (7j)*

| No. | RT    | Area (%) | Concentration (%) | BC  |
|-----|-------|----------|-------------------|-----|
| 1   | 1.773 | 5537     | 0.105             | BB  |
| 2   | 3.200 | 131857   | 2.494             | BV  |
| 3   | 3.507 | 5119190  | 96.807            | VV  |
| 4   | 4.153 | 10559    | 0.200             | TBB |
| 5   | 4.633 | 20880    | 0.395             | TBB |
|     |       |          | 100.00            |     |



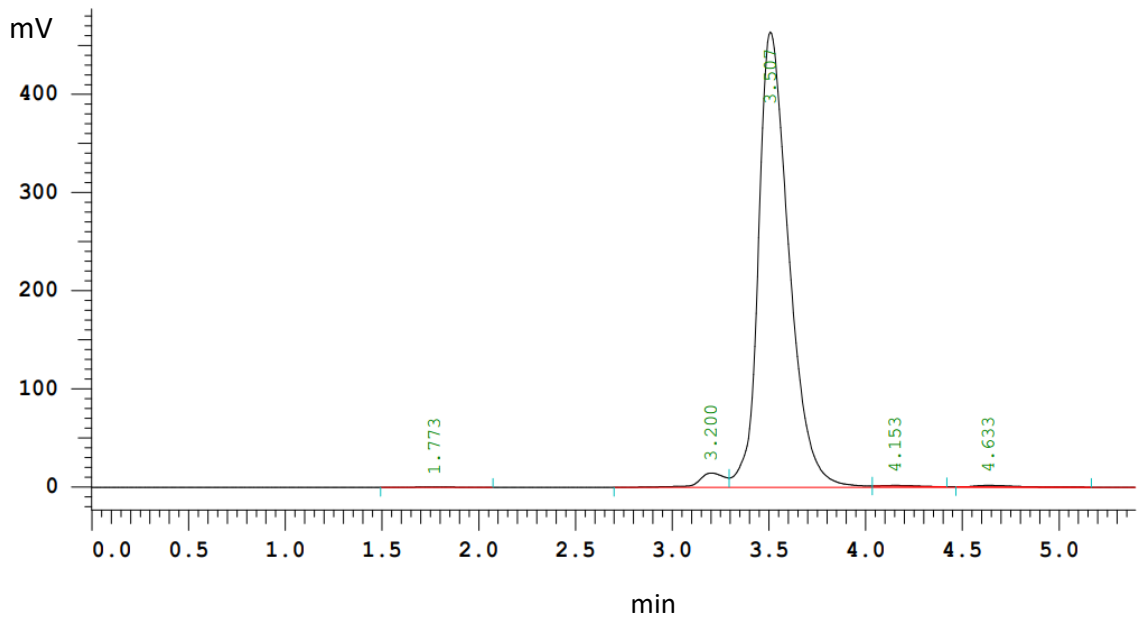

-12.525  
 -9.300  
 8.055  
 8.052  
 8.050  
 8.042  
 8.039  
 8.036  
 8.013  
 8.011  
 8.000  
 8.000  
 7.995  
 7.884  
 7.775  
 7.751  
 7.729  
 7.727  
 7.724  
 7.606  
 7.603  
 7.600  
 7.592  
 7.590  
 7.304  
 7.302  
 7.300  
 7.298  
 7.294  
 7.291  
 7.289  
 7.288  
 7.286  
 2.414  
 2.412  
 2.409  
 2.407

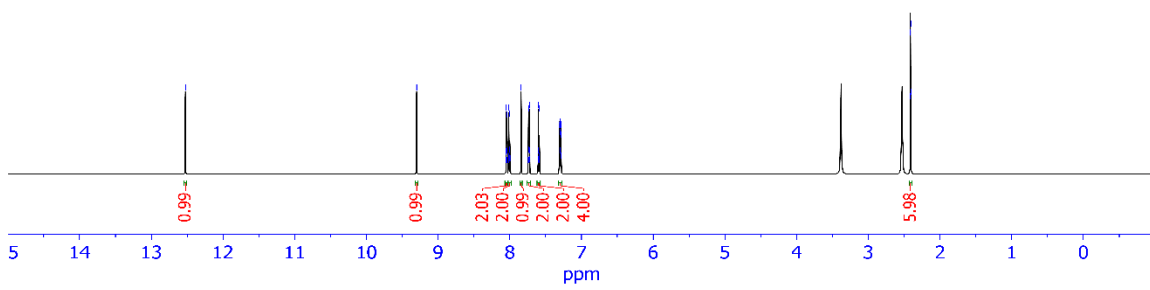

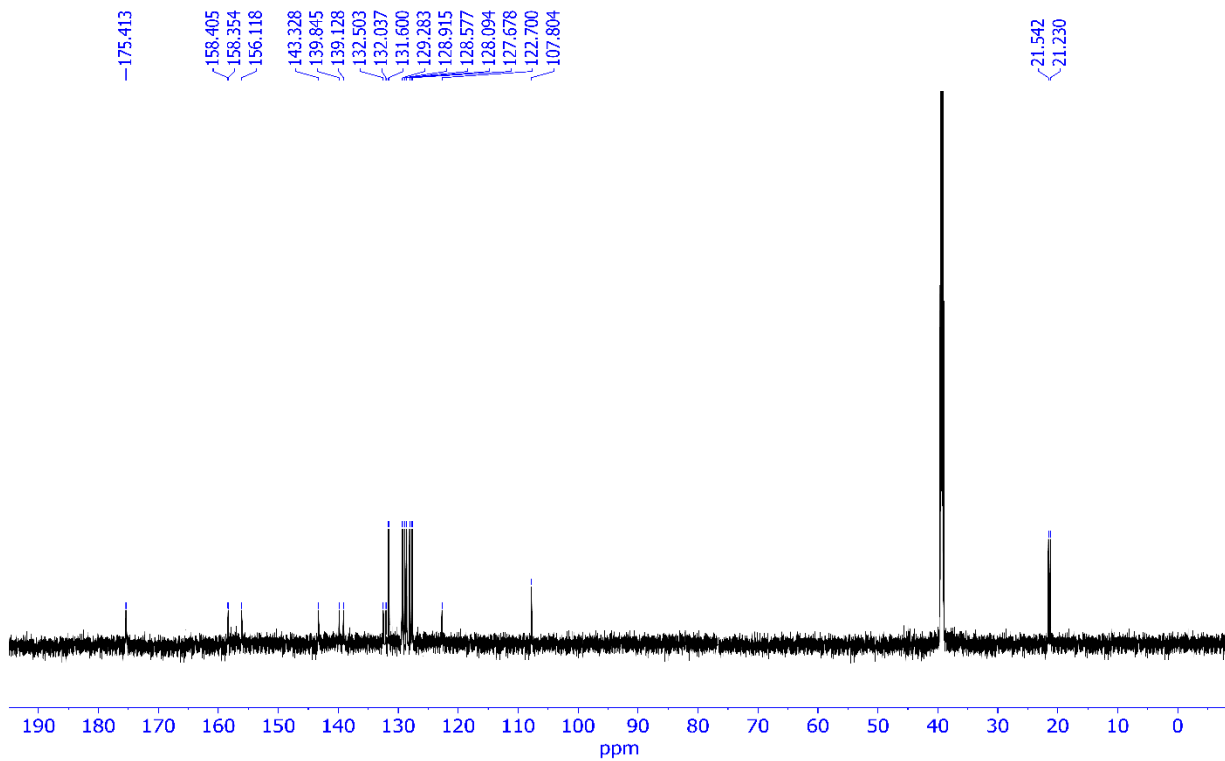

6D\_200506135522 #127 RT: 1.27 AV: 1 NL: 1.73E5  
 T: ITMS + c ESI Full ms [50.00-2000.00]

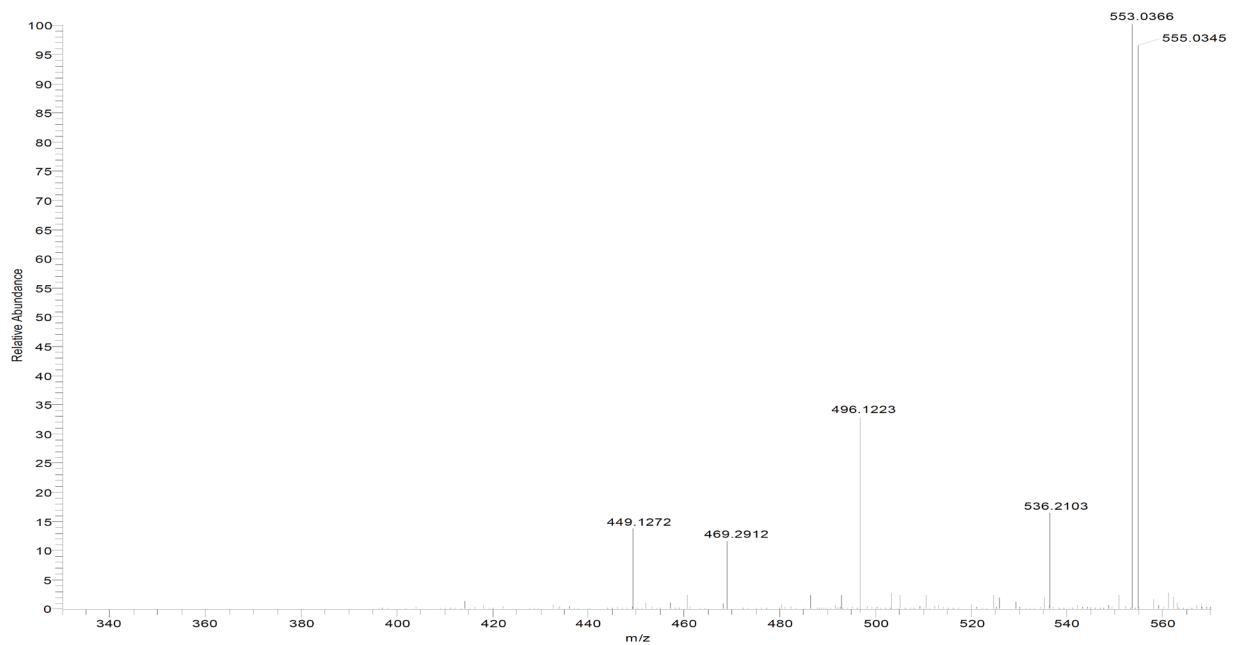

*N-((4-(4-Bromophenyl)-6-(4-isopropylphenyl)pyrimidin-2-yl)carbamothioyl)-4-methylbenzenesulphonamide (7k)*

| No. | RT    | Area (%) | Concentration (%) | BC  |
|-----|-------|----------|-------------------|-----|
| 1   | 1.927 | 25856    | 0.145             | BV  |
| 2   | 2.340 | 56014    | 0.314             | VV  |
| 3   | 3.180 | 41491    | 0.232             | VV  |
| 4   | 3.893 | 564929   | 3.163             | VV  |
| 5   | 4.627 | 17168353 | 96.126            | VV  |
| 6   | 6.293 | 3631     | 0.020             | TBB |
|     |       | 17860274 | 100.00            |     |

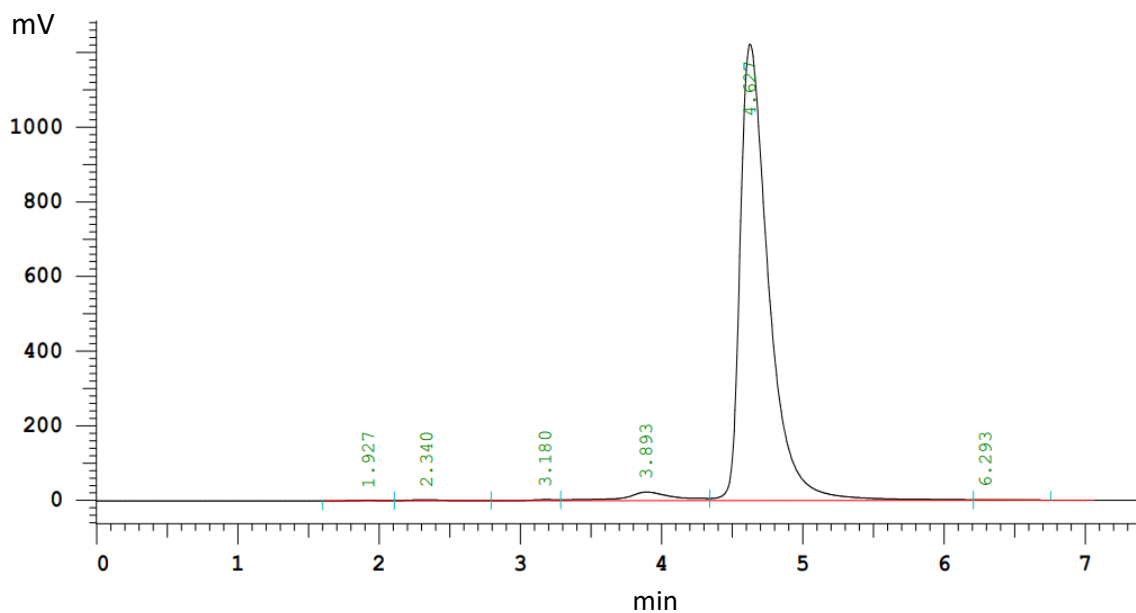

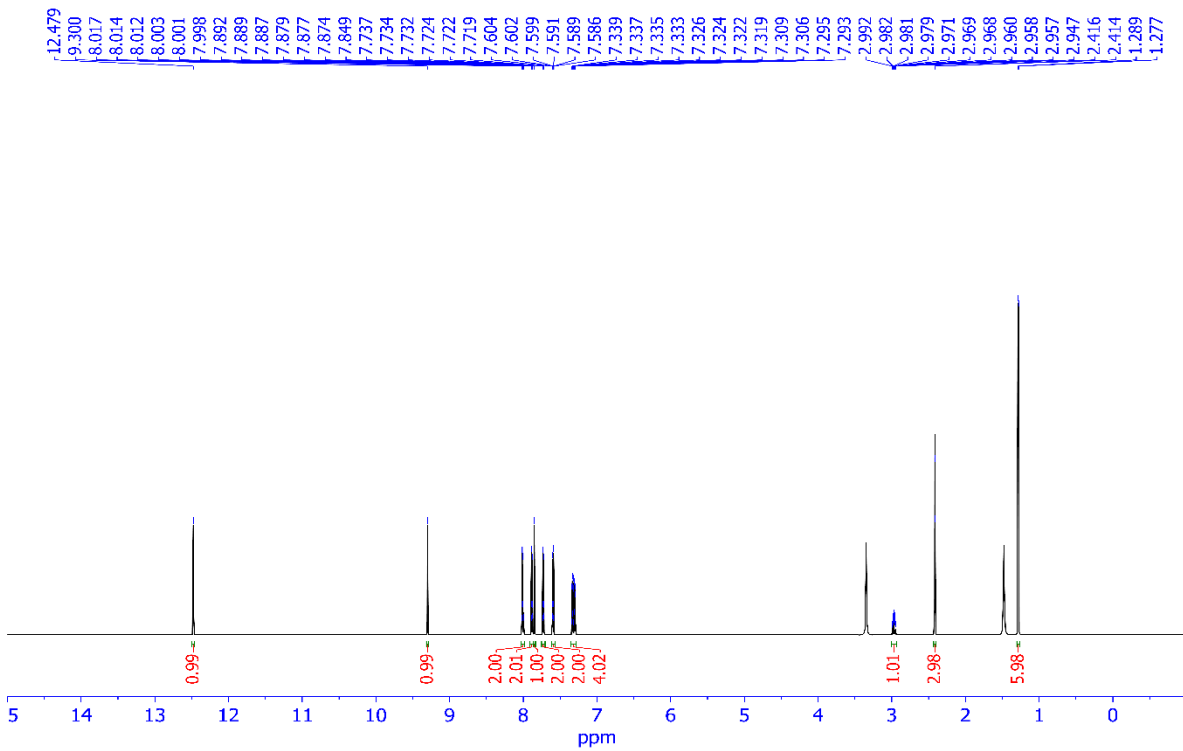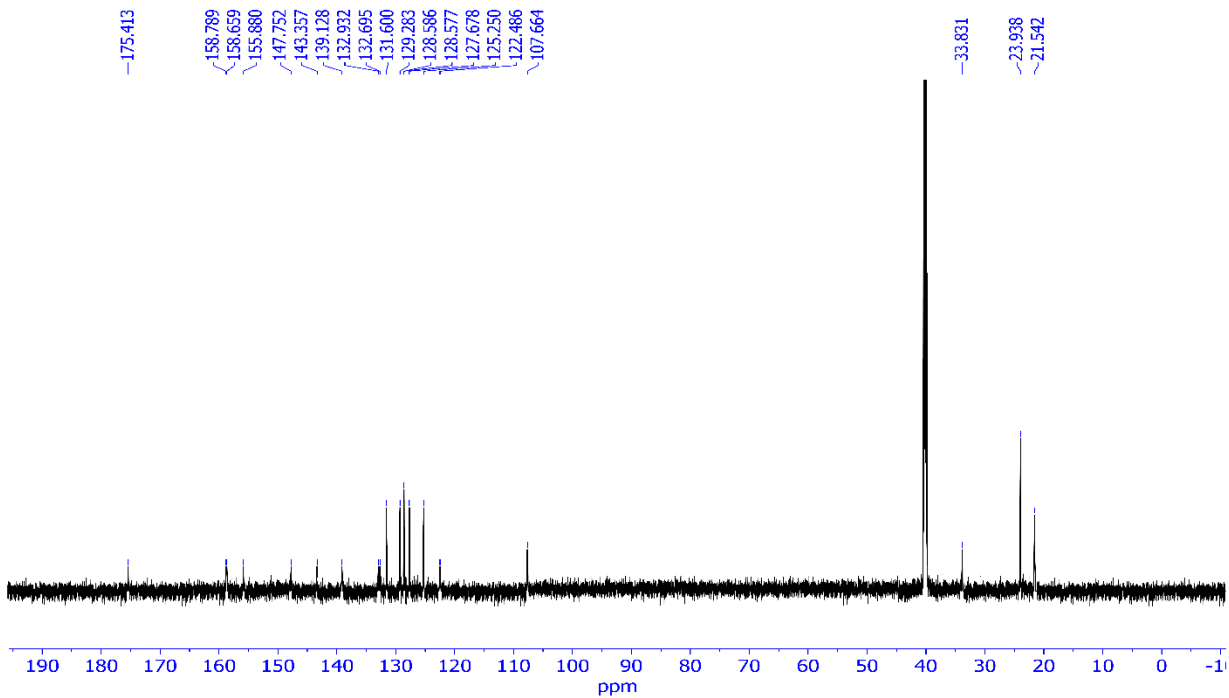

6D\_200506135522 #127 RT: 1.27 AV: 1 NL: 1.73E5  
T: ITMS + c ESI Full ms [50.00-2000.00]

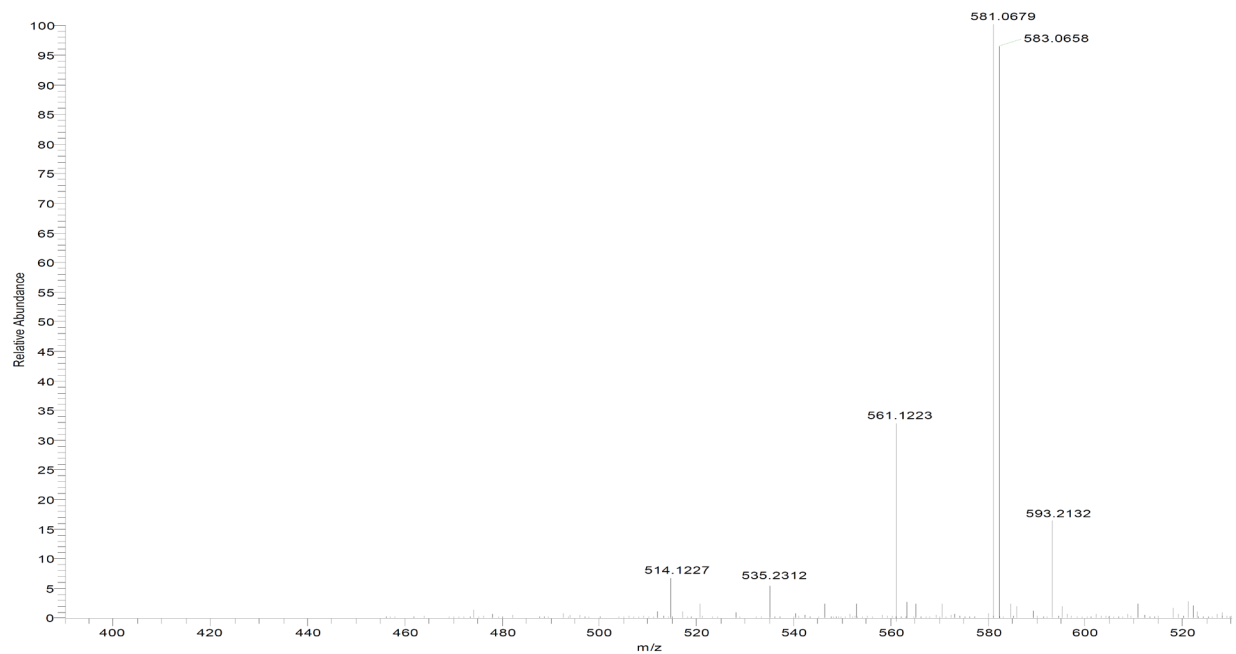

*N*-((4-(4-Bromophenyl)-6-(4-hydroxyphenyl)pyrimidin-2-yl)carbamothioyl)-4-methylbenzenesulphonamide (**7I**)

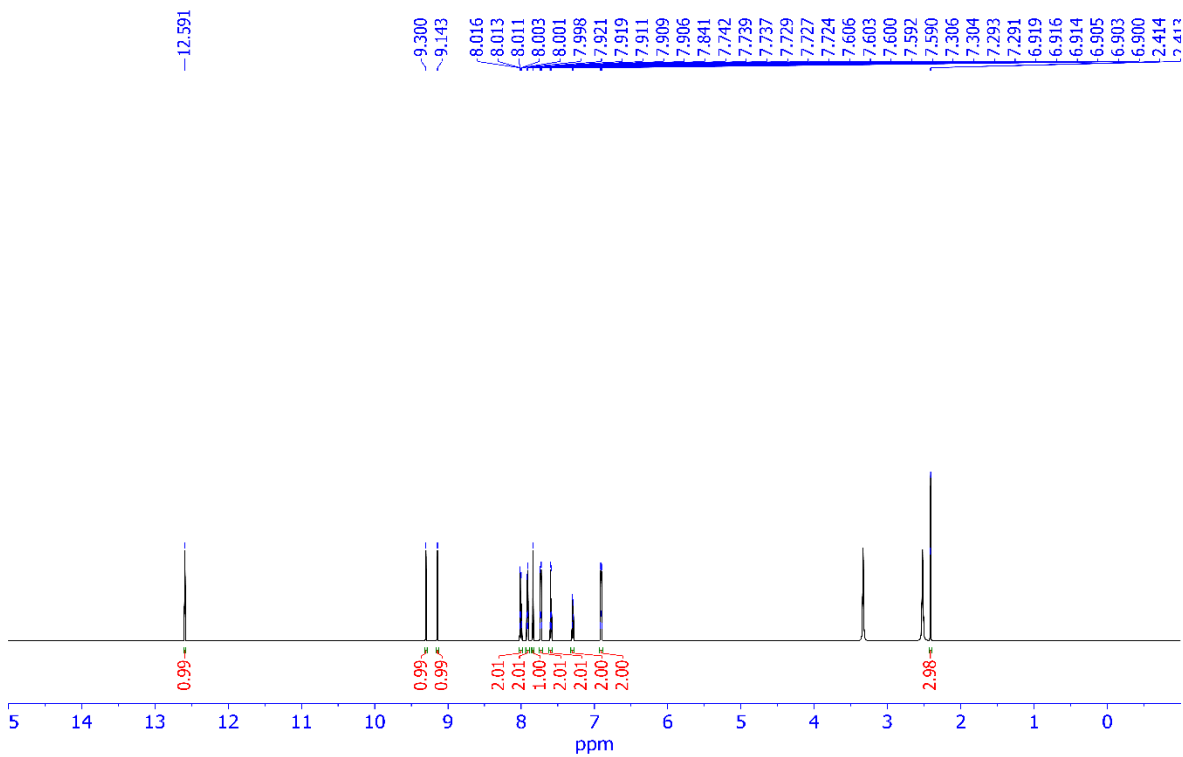

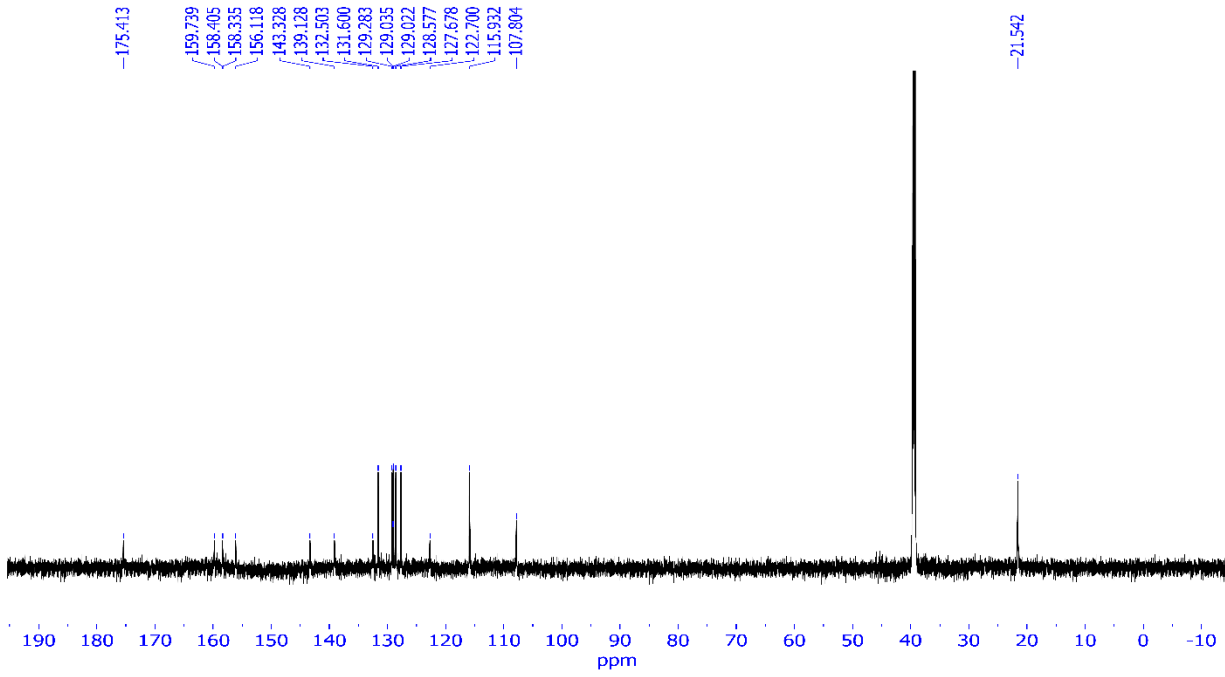

6D\_200506135522 #127 RT: 1.27 AV: 1 NL: 1.73E5  
 T: ITMS + c ESI Full ms [50.00-2000.00]

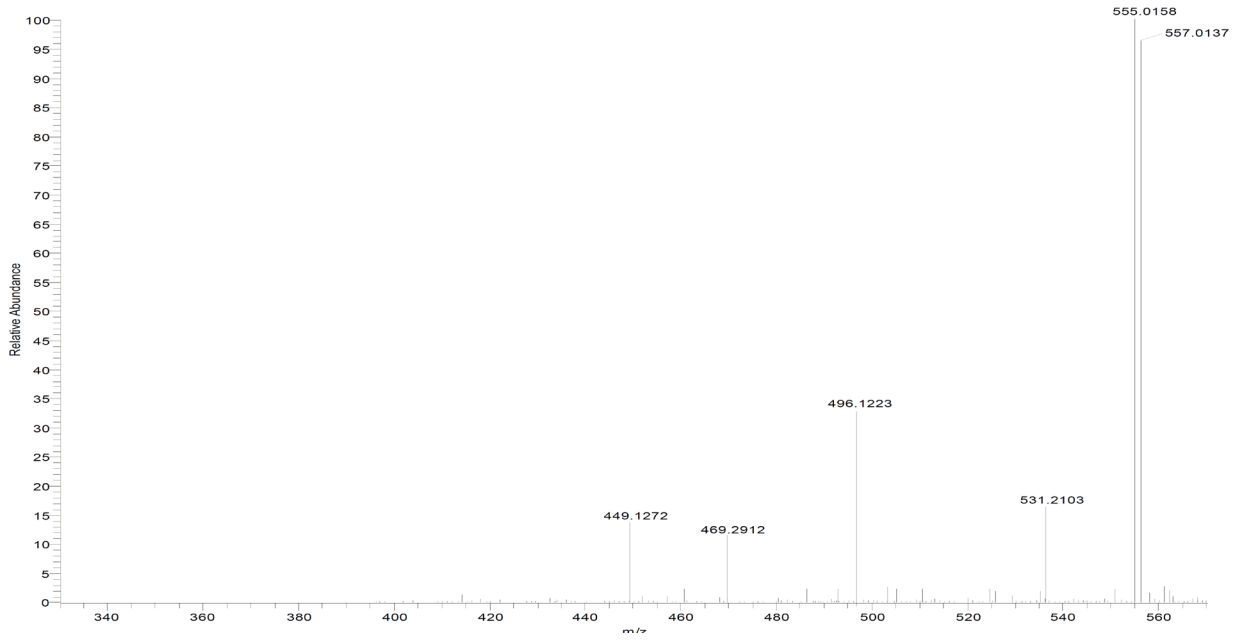

*N*-((4-(4-Bromophenyl)-6-(4-(dimethylamino)phenyl)pyrimidin-2-yl)carbamothioyl)-4-methylbenzenesulphonamide (**7m**)

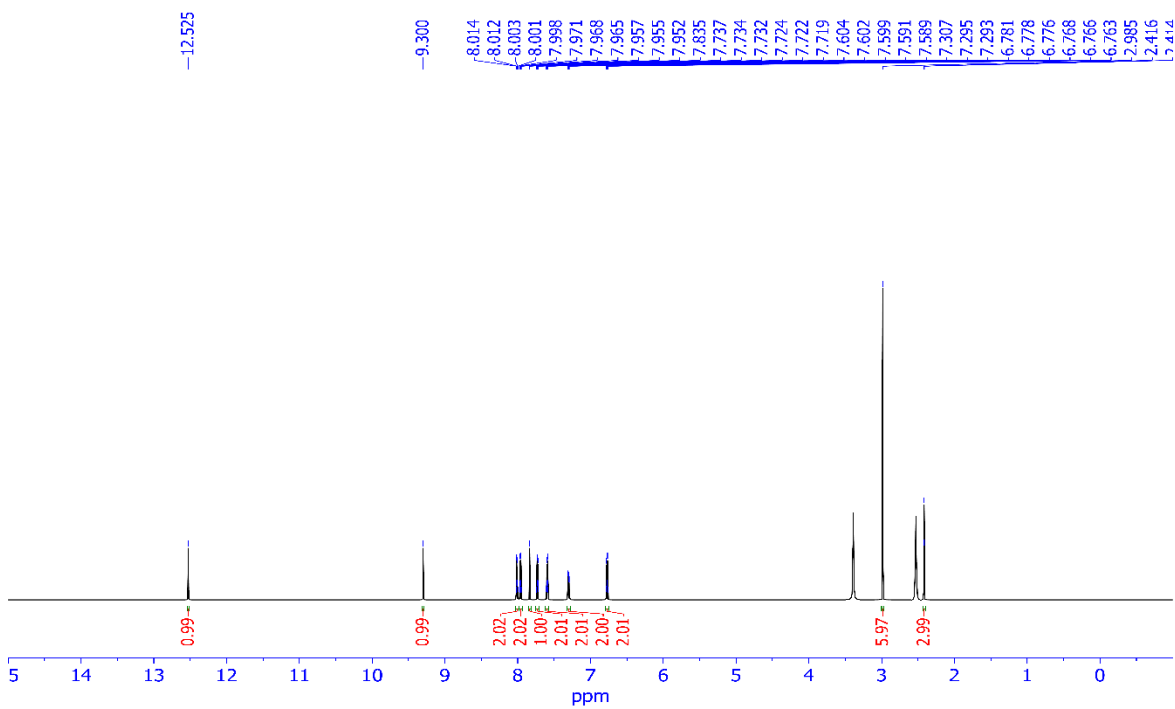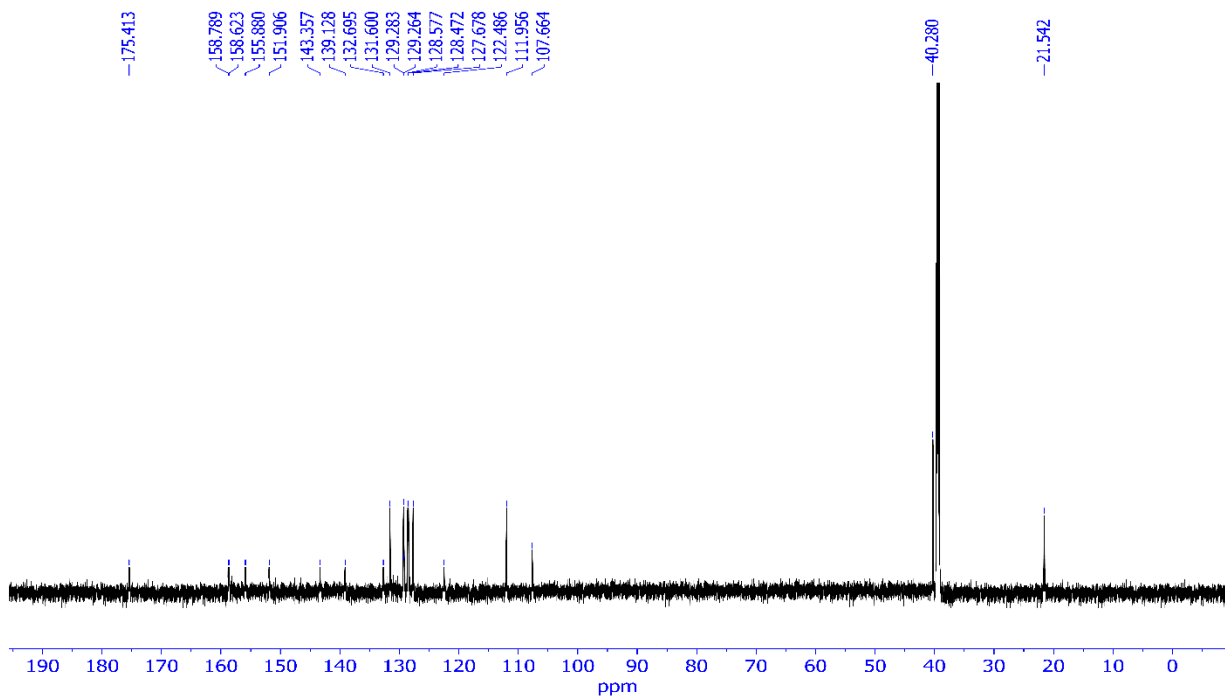

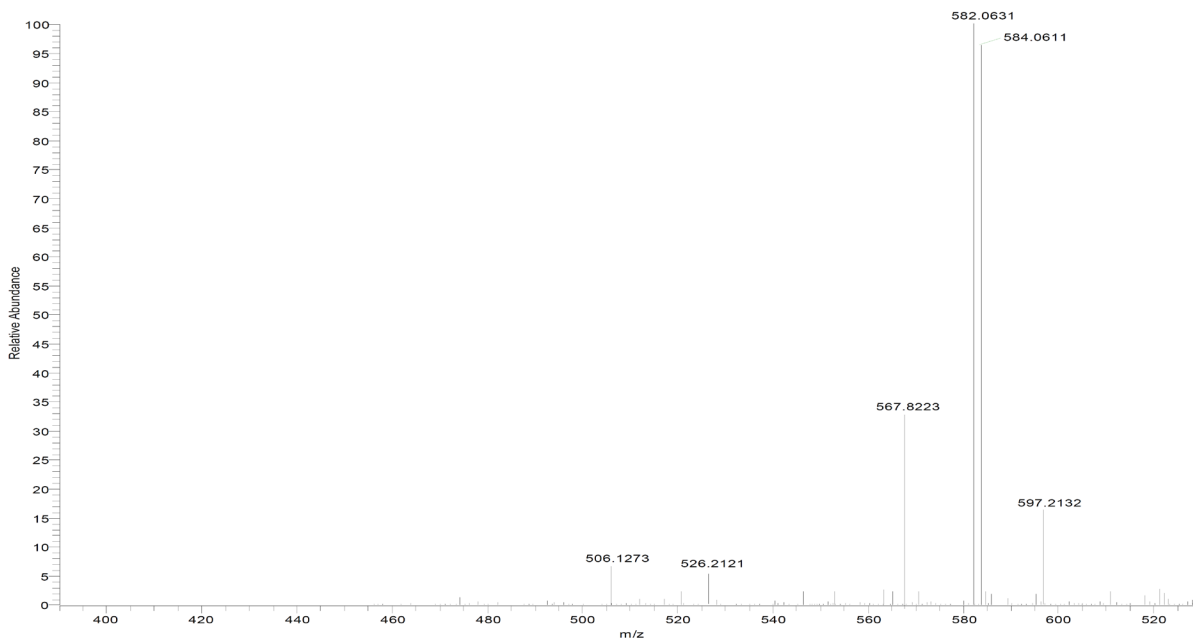

Supplement: d4md00816b1.pdf [file d4md00816b1.pdf]
